# Supplementary material for: Role of Age-Related Changes in DNA Methylation in the Disproportionate Susceptibility and Worse Outcomes of Sepsis in Older Adults
Source: Frontiers journal article supplement (doi:10.3389/fmed.2022.822847), 2022-02-15
Supplement: Data_Sheet_1.PDF [file Data_Sheet_1.PDF]

## *Supplementary Material*

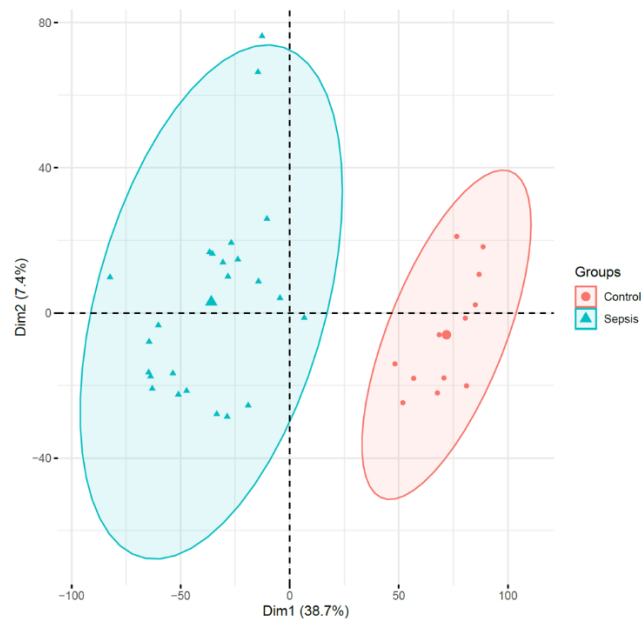

**Supplementary Figure 1.** Principal component analysis (PCA) of methylation data of methylation variable positions (MVPs) in sepsis and control group (in blue and red respectively).

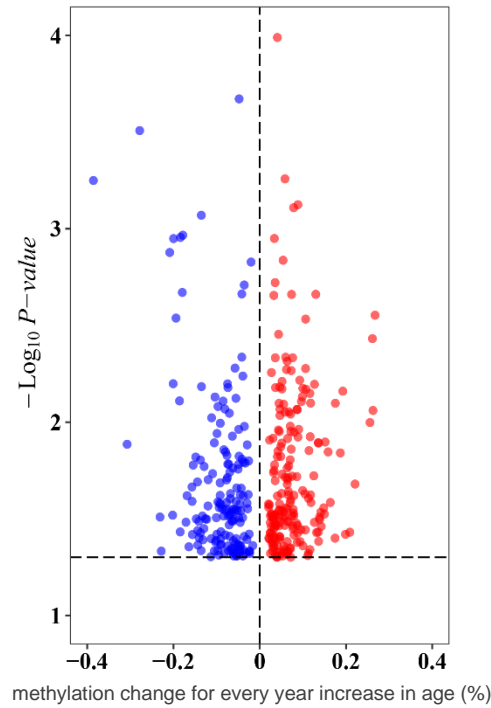

**Supplementary Figure 2.** Volcano plot of age-related CpG sites (n=366) in controls.

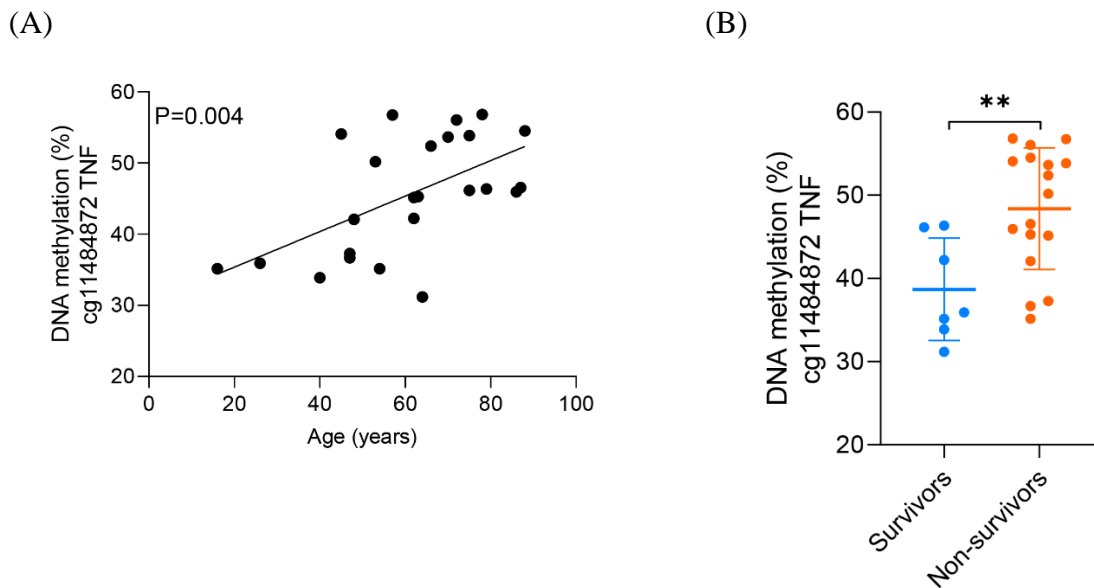

**Supplementary Figure 3.** DNA methylation of the CpG site (cg11484872) in TNF. (A) Correlation between age and methylation of the CpG site (cg11484872) in TNF as analysed by linear regression analysis (n=24). (B) 24 sepsis patients were divided into two groups (7 survivors and 17 non-survivors) according to their hospital outcomes. Data shown are mean  $\pm$  SD. \*\*P < 0.01. Comparisons between two groups were done by student's t-test.
