# Supplementary material for: Role of Age-Related Changes in DNA Methylation in the Disproportionate Susceptibility and Worse Outcomes of Sepsis in Older Adults
Source: Front Med (Lausanne). 2022 Feb 15;9:822847. doi: 10.3389/fmed.2022.822847 (PMC8886726; doi:10.3389/fmed.2022.822847)
Supplement: Supplementary file 1 [file Table_1.XLSX]

## Sheet: Table S1
Supplementary Table 1. Characteristics of the sepsis patients and controls in the study.
	sepsis	control
	(n=24)	(n=12)
Mean age (yr)	60.8±18.6	56.7±19.1
Male sex (%)	0.583	0.583
Premorbidity (%)
Heypertension	0.5
Diabetes	0.083
Cardiovascular disease	0.125
Chronic kidney disease	0.0833
Cancer	0.2083
Acute kidney injury (%）	0.7917
Main source of infection (%)
Chest	0.375
Abdomen	0.375
Bloodstream	0.125
Other unkonwn source	0.125
ICU admission examination
Scr (umol/L)	151.2±108.1
WBC (*10^9/L)	15.5±18.4
PLT (*10^9/L)	154.1±105.2
SOFA score	8.2±3.8
APACHEII score	19.0±6.3
Length of ICU stay	16.8±17.9
Length of hospital stay	24.1±19.4
Hospitalized mortality	0.708
Data shown are mean ± SD. Scr, Serum creatine; WBC, white blood cell; PLT, blood platelet; SOFA, Sequential Organ Failure Assessment; APACHE II, Acute Physiology and Chronic Health Evaluation II.
