# Supplementary material for: Role of Age-Related Changes in DNA Methylation in the Disproportionate Susceptibility and Worse Outcomes of Sepsis in Older Adults
Source: Front Med (Lausanne). 2022 Feb 15;9:822847. doi: 10.3389/fmed.2022.822847 (PMC8886726; doi:10.3389/fmed.2022.822847)
Supplement: Supplementary file 2 [file Table_2.XLSX]

## Sheet: Table S2
Supplementary Table 2. sepsis-associated methylation variable positions.
Probe ID	△β	P.Value	FDR
cg12303247	0.4704	2.73e-06	0.00249391
cg17589866	0.4163	7.69e-11	2.68e-06
cg20995564	-0.4121	2.47e-13	3.44e-08
cg19789919	-0.3725	4.26e-05	0.0101471
cg05304729	0.3455	3.8e-11	1.59e-06
cg01267076	0.3315	0.000324665	0.0286966
cg20228731	-0.3017	1.48e-06	0.00180101
cg14195992	-0.2923	3.4e-08	0.000173449
cg17515347	-0.2756	1.67e-09	2.93e-05
cg06804705	-0.2685	1.11e-06	0.00146913
cg07222133	-0.2506	0.000801552	0.0445887
cg23039250	-0.2486	4.75e-07	0.000878331
cg12992827	-0.2479	2.14e-08	0.000123928
cg27307975	-0.2453	5.66e-07	0.000983834
cg03546163	-0.2452	1.5e-07	0.000437585
cg00490406	-0.2349	2.79e-08	0.000149393
cg02132463	0.2321	0.000125095	0.0174062
cg15928106	-0.228	6.38e-06	0.00378579
cg04036920	0.2262	0.000359218	0.030199
cg19821297	-0.2226	1.13e-08	7.86e-05
cg26227957	0.2145	8.52e-06	0.00444154
cg23982317	0.2111	0.000620723	0.0394492
cg24954967	-0.2082	2.08e-06	0.00219075
cg02003183	0.2047	0.000431976	0.0331074
cg11384744	-0.2047	3.15e-05	0.00874756
cg16755922	0.2033	2.97e-06	0.00257637
cg10949007	-0.2017	0.000124047	0.0173243
cg16691087	0.2015	4e-06	0.00303578
cg06039489	0.1963	5.64e-06	0.00358311
cg00883689	-0.1951	1.94e-06	0.00211256
cg13165240	0.1948	7.69e-08	0.00028695
cg09881842	0.1945	1.34e-06	0.00167645
cg15551881	0.1924	9.02e-05	0.0146553
cg18346531	-0.1921	2.26e-05	0.00739565
cg20519581	-0.1898	1.55e-07	0.000439933
cg00506299	-0.1897	5.62e-08	0.000230726
cg19805943	-0.1892	1.57e-06	0.00184914
cg13033858	-0.1887	1.82e-07	0.000481638
cg16805291	0.1881	0.000102684	0.0157125
cg18663307	0.1881	7.97e-09	6.8e-05
cg12896170	-0.1873	7.64e-06	0.00416124
cg05680237	-0.1829	2.22e-05	0.00728895
cg06092244	-0.1814	0.000108998	0.0161331
cg18860310	-0.1807	2.89e-06	0.00255211
cg04321224	0.1802	2.84e-11	1.41e-06
cg03550384	-0.18	8.3e-05	0.0140936
cg09349128	-0.1792	1.38e-10	4.44e-06
cg13258453	-0.178	2.48e-06	0.00239333
cg07961098	0.1774	2.54e-06	0.00241848
cg25114611	-0.1768	7.57e-12	5.28e-07
cg25710630	0.1756	4.96e-06	0.00336266
cg09610644	0.1741	2.63e-07	0.000581619
cg00240598	0.172	0.000236333	0.0242595
cg02107842	0.1717	9.29e-05	0.0148583
cg12655112	-0.1704	1.16e-05	0.005107
cg02820566	0.1699	0.000600815	0.0388939
cg00522231	0.1679	2.56e-05	0.00784814
cg16300565	-0.1679	1.51e-05	0.00590054
cg25423174	-0.1679	3.36e-07	0.000696107
cg18518074	0.1667	1.3e-05	0.00545672
cg25897519	-0.1663	1.99e-06	0.00214818
cg12644285	-0.1646	3.17e-05	0.00877686
cg05857996	0.1644	0.000576601	0.0381591
cg01462353	-0.164	0.000343558	0.029509
cg06545761	-0.1634	1.35e-07	0.000417945
cg07992500	0.1626	1.99e-07	0.000494264
cg21554670	-0.1623	0.000139193	0.0183536
cg12126038	-0.1619	1.5e-05	0.00587707
cg18995788	-0.1614	2.93e-05	0.00840376
cg00705600	-0.1606	0.000174003	0.0205747
cg22185977	0.1602	1.42e-06	0.00174751
cg05538887	-0.1598	0.000617205	0.0393296
cg04565255	-0.1591	1.47e-11	8.77e-07
cg09635667	-0.1586	2.17e-05	0.00721268
cg25069807	-0.157	0.000587522	0.0384978
cg12078154	0.1563	6.66e-06	0.00387535
cg15609734	-0.1562	0.000182115	0.0209992
cg02814054	0.1548	1.12e-05	0.00503595
cg16639691	0.1548	2.07e-06	0.00219075
cg01183122	-0.1547	1.35e-05	0.00553354
cg22488164	0.1541	4.15e-07	0.000796289
cg06965195	-0.1523	0.000220308	0.0233425
cg16875057	-0.1523	9.91e-06	0.00478555
cg15033511	-0.1521	6.46e-05	0.0124787
cg15472071	-0.1521	5.24e-06	0.0034996
cg08998950	-0.1519	0.000284519	0.0267971
cg10864794	-0.1517	8.71e-06	0.00447949
cg07243548	-0.1507	4.71e-05	0.0107108
cg08504583	0.1506	2.06e-05	0.00701841
cg12054453	-0.1494	8.17e-06	0.00436851
cg15888569	0.1491	0.00014551	0.0188375
cg25722644	-0.1485	0.00100739	0.0499438
cg14237301	0.1476	1.46e-07	0.000433992
cg16015295	-0.1476	1.03e-05	0.00485005
cg00955808	0.1469	7.35e-05	0.0133119
cg16729631	-0.1469	0.000793411	0.0443835
cg03348161	-0.1468	0.000264885	0.0257367
cg13661827	-0.1467	1.1e-06	0.00146716
cg04987734	0.1465	0.00029391	0.0272578
cg24680570	-0.1463	0.00072902	0.0426287
cg21088514	-0.1459	9.08e-06	0.00455612
cg07824483	-0.1458	0.000219462	0.0232756
cg15082870	0.1456	2.44e-06	0.00238572
cg18734877	-0.1453	2.02e-06	0.00215794
cg04222728	-0.1449	0.000134747	0.0180093
cg01243312	0.1446	0.000461345	0.0341728
cg00840990	-0.1444	3.63e-05	0.0094458
cg17501210	-0.1443	7.45e-05	0.0133806
cg22959742	0.1442	0.000153637	0.0193981
cg23391288	-0.1433	0.000371632	0.0305904
cg01656216	-0.143	3.6e-05	0.00942855
cg24448340	-0.143	0.000236917	0.0242956
cg10722267	0.1426	2.85e-05	0.00829641
cg09501509	-0.1415	6.27e-05	0.0122911
cg13316148	-0.1414	0.000497096	0.0355667
cg25119415	0.1414	1.68e-09	2.93e-05
cg07594831	-0.141	0.000939947	0.0483115
cg04958236	-0.1409	1.07e-06	0.00144176
cg21805179	0.1409	2.8e-05	0.00822742
cg00382138	-0.1408	5.19e-08	0.000223474
cg27094376	-0.1406	0.000243525	0.0246679
cg26037602	0.1404	0.000740296	0.0428596
cg27380915	-0.1403	1.43e-05	0.00574256
cg22534374	-0.14	4.6e-06	0.00328376
cg17411016	-0.1397	1.53e-07	0.000439903
cg04523589	0.1392	8.63e-06	0.00445956
cg08521967	0.1376	0.000802836	0.0446187
cg24661168	-0.1376	0.000703886	0.0420189
cg06578434	-0.137	0.000819287	0.0450501
cg10780778	-0.137	0.000244444	0.0246978
cg13086983	-0.1369	0.000301031	0.0276241
cg16292768	-0.1369	0.000263096	0.0256537
cg17051905	-0.1366	0.000181979	0.0209992
cg19411922	0.1362	3.06e-05	0.00860754
cg04771100	-0.136	0.000315504	0.0282877
cg04836151	0.1352	0.000554497	0.0373286
cg16663980	0.1349	9.96e-06	0.00478877
cg04465154	-0.1342	9.22e-07	0.00132663
cg04890607	-0.134	4.45e-05	0.010406
cg19647567	-0.134	0.000132972	0.0179178
cg26716046	-0.1339	0.000182438	0.0210248
cg05279866	0.1335	9.76e-05	0.0152484
cg14965639	-0.1332	3.89e-06	0.00299003
cg13585930	-0.1331	1.27e-07	0.000398261
cg05436845	-0.133	0.0008273	0.0452384
cg21964800	-0.133	0.000225144	0.0236506
cg02448796	0.1329	0.000111136	0.016311
cg07243202	-0.1329	1.1e-05	0.00498234
cg14781394	-0.1326	8.5e-06	0.00444154
cg15227911	0.1323	0.000851653	0.0459687
cg13005202	0.1319	0.000330919	0.0290088
cg19739596	-0.1316	0.000675519	0.0410824
cg09303642	-0.1314	0.000459202	0.0340645
cg07276358	-0.1313	0.000182954	0.0210492
cg22691626	-0.1303	5.62e-05	0.0116315
cg06573254	0.1302	0.000366266	0.0303748
cg27519958	-0.1301	3.7e-05	0.00951128
cg01574364	-0.1298	0.00058187	0.0383077
cg24333621	-0.1296	0.00036099	0.0302053
cg01059398	-0.1295	5.32e-05	0.0113772
cg04913803	-0.1292	1.2e-05	0.005221
cg23018755	-0.129	0.000787022	0.0442344
cg19269956	-0.1285	0.000518907	0.0362221
cg17602444	-0.1283	3.09e-05	0.00863347
cg12972064	-0.128	0.000262738	0.0256537
cg14113958	-0.1275	3e-05	0.00853803
cg19782190	0.1275	5.51e-05	0.0115372
cg26680989	0.1273	0.000965054	0.0489482
cg25112191	-0.1271	0.000898087	0.0472181
cg03695871	0.1269	9.82e-05	0.0152967
cg16463452	-0.1266	6.09e-05	0.0121473
cg01948217	-0.1259	1.65e-08	0.000102712
cg23729283	0.1256	6.48e-09	6.24e-05
cg17115737	-0.1255	1.18e-05	0.00513282
cg02405193	-0.1251	0.000470901	0.0345925
cg03084350	0.125	1.9e-08	0.00011683
cg07205203	-0.125	0.00048965	0.0353242
cg19137806	0.1247	0.000161334	0.0197644
cg20348000	0.1247	3.12e-05	0.00869872
cg27310092	-0.1245	1.8e-06	0.00202686
cg02308232	-0.1244	0.000587192	0.0384955
cg12535715	-0.1243	3.88e-05	0.00976341
cg25604616	-0.1243	9.14e-06	0.00456518
cg01413054	-0.1241	0.000313215	0.0281792
cg22387323	-0.1241	0.000150231	0.0191666
cg23598089	0.1241	3.67e-06	0.00288705
cg01265860	-0.124	7.65e-06	0.004163
cg02214188	-0.124	2.05e-09	3.06e-05
cg10636246	-0.1238	1.48e-09	2.8e-05
cg26804423	0.1236	7.75e-05	0.0136182
cg00159243	-0.1235	3.87e-08	0.00018344
cg24621042	-0.1235	4.14e-05	0.0100124
cg00320216	-0.1234	0.000945946	0.0484909
cg06981309	-0.1233	0.000368814	0.0304725
cg16859420	-0.1233	4.29e-07	0.000811326
cg01178099	-0.1232	0.00087083	0.0464663
cg17782974	0.1229	0.000170565	0.0203814
cg13984746	-0.1228	0.000958012	0.0487903
cg03497652	0.1226	9.52e-05	0.0150346
cg14968553	0.1225	0.000162025	0.0198083
cg20094462	-0.1221	0.000722473	0.0424854
cg08886482	-0.1219	0.000517391	0.0361947
cg12880095	0.1217	0.000164381	0.0199369
cg21326139	-0.1217	0.000524158	0.0363609
cg26468118	-0.1217	2.99e-05	0.00853803
cg18942579	-0.1215	3.38e-05	0.0090504
cg08551725	-0.1214	0.000378715	0.0308996
cg22069247	0.1213	6.02e-11	2.29e-06
cg27049094	0.1212	0.000284111	0.0267793
cg04757345	-0.121	0.000188747	0.0213921
cg00423035	-0.1208	0.000682658	0.0413361
cg00645383	0.1206	5.74e-06	0.00358372
cg13736811	-0.1206	0.000123962	0.0173236
cg16395997	0.1206	0.000195723	0.0218161
cg27020362	-0.1206	9.83e-10	2.12e-05
cg13558754	-0.1204	0.000468001	0.0344643
cg08055131	-0.1203	0.000449659	0.0338166
cg17087974	-0.1201	0.000356113	0.0300528
cg09354692	-0.12	1.24e-05	0.00530521
cg15502231	-0.12	0.000179921	0.0209269
cg18520851	0.1197	0.000377648	0.0308487
cg18819791	-0.1197	2.38e-05	0.00758403
cg18591228	-0.1196	0.000856203	0.0461268
cg26226650	-0.1196	0.000132496	0.0179021
cg17150809	-0.1194	0.000955128	0.0487107
cg23902264	0.1194	8.13e-06	0.00435752
cg07546654	-0.1193	0.000798286	0.0444959
cg24405567	-0.1192	0.000218116	0.023228
cg08915438	-0.119	2.35e-05	0.00756478
cg24408769	0.1189	0.000415013	0.0324669
cg16553238	-0.1187	0.000675105	0.0410824
cg00634542	0.1183	1.38e-05	0.00561357
cg16535752	0.1183	0.000915329	0.0476282
cg12555844	-0.1182	0.000273968	0.026181
cg26610247	0.1182	0.000750043	0.0430425
cg25368647	-0.1181	0.000317223	0.0283736
cg17781958	0.1177	0.000375102	0.0307368
cg24998981	-0.1176	6.58e-05	0.0126046
cg07099567	-0.1175	7.59e-05	0.0135253
cg20487608	-0.1175	0.000385543	0.0311647
cg06857116	-0.1172	0.000280879	0.0265861
cg23344523	-0.1172	1.24e-05	0.00530521
cg04810287	-0.1171	1.5e-07	0.000437585
cg12949141	-0.1171	3.98e-06	0.00303242
cg03370704	0.1167	0.000277132	0.0263628
cg17588094	-0.1167	3.19e-08	0.000168637
cg24578937	-0.1165	9.91e-05	0.0153776
cg26305504	-0.1165	0.000464136	0.0343005
cg26746309	-0.1164	0.000297242	0.0274323
cg16727231	0.116	0.00070333	0.0420157
cg25811633	-0.1156	0.000656591	0.0404552
cg04451880	-0.1155	1.07e-05	0.00493212
cg23752007	0.1154	5.2e-06	0.00348203
cg27535410	-0.1154	0.000455147	0.0339776
cg01800253	-0.1153	0.000756977	0.0432488
cg00409104	-0.1152	0.000356824	0.0300781
cg05515099	0.1152	0.000355437	0.0300503
cg08549335	-0.1148	0.000512256	0.0360167
cg10435245	-0.1148	0.000794194	0.0443956
cg01806261	-0.1147	0.000728142	0.0426268
cg09121543	0.1147	0.000199552	0.0220839
cg15863827	0.1146	6.25e-05	0.0122911
cg07012687	0.1143	0.000487518	0.0352162
cg06680852	-0.1142	3.22e-06	0.00266074
cg05455036	-0.1141	0.000910181	0.0475082
cg12404181	-0.1141	0.000604156	0.0389493
cg02719954	0.114	0.000348708	0.029728
cg03699074	-0.1139	3.03e-11	1.41e-06
cg12510999	-0.1139	0.00016283	0.0198571
cg24678320	-0.1138	0.000231111	0.0239683
cg02217713	-0.1137	4.08e-06	0.00308666
cg20991420	-0.1137	0.00012715	0.0176101
cg14303526	0.1136	0.000189553	0.0214196
cg15901722	-0.1136	7.98e-08	0.000290094
cg03836615	-0.1135	7.31e-05	0.0132746
cg05316065	-0.1132	1.6e-06	0.00187058
cg18680181	-0.1132	0.000891501	0.047087
cg22626683	-0.1132	6.23e-06	0.00373777
cg15453278	-0.1121	0.000117695	0.0167901
cg07732037	0.1117	5.59e-05	0.0116221
cg23580000	0.1115	1.55e-06	0.00184914
cg02976843	0.1114	0.000160188	0.0196997
cg21221263	-0.1113	0.000936749	0.0482494
cg00619628	0.1111	0.000770436	0.0436735
cg23361127	-0.1111	0.000863958	0.0462709
cg23990942	-0.1111	0.000760017	0.0433086
cg02319818	0.111	5.08e-13	4.25e-08
cg09481056	0.111	1.91e-05	0.00672767
cg19619585	0.111	0.000239407	0.0244489
cg07458272	0.1109	0.000120089	0.0169828
cg00826902	0.1104	6.65e-05	0.012652
cg09552548	-0.1103	0.000475612	0.0347452
cg11382945	0.1103	0.000215012	0.0230558
cg16634193	-0.1103	0.000576834	0.0381597
cg01891966	-0.1102	2.86e-07	0.000616588
cg19356022	-0.1101	0.000457822	0.0340567
cg23891487	-0.1101	3.2e-05	0.00881205
cg05072215	-0.1099	0.000274527	0.0262139
cg19574915	0.1097	5.35e-05	0.0114082
cg06875488	-0.1093	5.21e-06	0.00348767
cg07297964	-0.1087	0.000421379	0.0326775
cg11454936	0.1087	0.000160477	0.0196997
cg22516975	-0.1085	0.000107284	0.0160385
cg03281139	-0.1084	0.000362195	0.0302425
cg26123763	-0.1083	6.36e-05	0.0123701
cg03951877	0.1082	3.45e-07	0.000706233
cg03978137	0.1082	0.000924358	0.0478538
cg04094791	0.1082	0.000952169	0.048631
cg18522931	-0.1081	6.19e-05	0.0122511
cg07652854	0.108	6.39e-07	0.00106424
cg11884704	0.108	0.000174139	0.0205846
cg08453903	0.1079	0.000346712	0.0296485
cg14771313	-0.1079	0.000110748	0.0162827
cg22209723	-0.1079	0.000503283	0.0357353
cg04460609	0.1078	0.000526546	0.0364448
cg14553895	-0.1077	0.000194198	0.0217102
cg01596292	-0.1074	0.000423698	0.0327961
cg12415479	-0.1074	0.000974055	0.0492186
cg13186559	-0.1074	0.000746771	0.0429695
cg03290827	0.107	0.000339744	0.0293515
cg18245281	-0.107	0.00060953	0.0390922
cg00805874	0.1069	4.26e-05	0.0101471
cg04658021	-0.1069	1.55e-05	0.00595344
cg13155421	-0.1069	6.53e-05	0.012565
cg08692676	-0.1068	8.28e-05	0.0140899
cg03055440	-0.1066	4.04e-07	0.000789557
cg15143938	0.1066	0.000579536	0.0382444
cg26413942	-0.1066	3.08e-05	0.00863347
cg13857354	-0.1065	0.000654701	0.0403982
cg16490209	-0.1065	9.6e-05	0.0151053
cg20380468	0.1065	0.000807735	0.0447421
cg04366628	-0.1061	0.000672726	0.0410103
cg06644892	-0.106	0.000412773	0.0323602
cg09125779	-0.106	0.000111472	0.0163409
cg04268643	0.1059	0.000580773	0.0382897
cg01799015	-0.1058	0.000231013	0.0239683
cg07969669	-0.1058	0.000235338	0.0241811
cg09868035	-0.1058	0.000969279	0.0490672
cg14325025	-0.1055	0.00049348	0.0354653
cg05671644	-0.1054	0.000154694	0.0194114
cg06618497	-0.1054	2.36e-06	0.00235245
cg04785213	0.1053	0.000846697	0.0457958
cg05986288	-0.1051	0.000371973	0.0306004
cg22409100	-0.1051	0.000317721	0.0283834
cg07805542	-0.1049	2.89e-05	0.0083284
cg22018051	-0.1049	2.52e-05	0.0077848
cg02488385	-0.1048	6.71e-05	0.0126596
cg25155064	0.1048	0.00017244	0.0204609
cg03945538	-0.1044	0.000338319	0.0293186
cg11355029	-0.1044	0.000415362	0.0324853
cg13619623	0.1043	2.41e-05	0.00762592
cg03068497	-0.1042	0.000349651	0.029778
cg15046062	-0.1042	0.000493705	0.0354653
cg04039397	-0.1041	0.000481661	0.0349894
cg14427668	-0.1041	0.000135541	0.0180659
cg18456331	-0.1041	0.000138043	0.0182685
cg24002003	-0.104	6.82e-08	0.00026135
cg15827092	-0.1039	0.000483883	0.0350533
cg17209188	-0.1039	0.000717002	0.0423395
cg21808406	-0.1039	1.01e-06	0.00139356
cg24762231	-0.1039	0.000496353	0.0355501
cg03741653	-0.1038	0.000599715	0.0388603
cg12517576	-0.1038	0.000977715	0.0492972
cg19851574	0.1038	5.12e-05	0.0112096
cg21039723	-0.1038	0.000816799	0.0449879
cg08943045	-0.1037	9.25e-07	0.00132663
cg15125472	-0.1037	6.19e-06	0.00372777
cg04326337	0.1036	0.000442228	0.0334935
cg08505647	-0.1036	0.000227516	0.0237808
cg23379806	-0.1036	0.00048558	0.0351337
cg17714987	-0.1035	3.42e-05	0.00911608
cg03664994	-0.1034	0.000902282	0.0473086
cg10045881	-0.1034	4.56e-05	0.0105083
cg19400926	-0.1034	3.33e-09	4.21e-05
cg02879453	0.1033	5.81e-06	0.00359881
cg00868074	-0.1031	2.22e-05	0.00729987
cg06390643	-0.103	0.000984185	0.0494802
cg02707799	0.1029	0.000240184	0.0245044
cg08363114	-0.1029	1.93e-06	0.00211256
cg13322252	0.1027	1.53e-05	0.00593214
cg09747445	-0.1026	7.13e-06	0.00404043
cg13714797	-0.1026	3.91e-07	0.000776031
cg15085883	-0.1024	4.88e-06	0.00336266
cg14140060	-0.1023	4.93e-05	0.0109617
cg19529732	0.1022	7.39e-05	0.0133119
cg03074946	0.102	4.06e-05	0.00993825
cg06053959	-0.102	9.44e-05	0.0149786
cg06151145	0.102	0.000473958	0.0347012
cg06881965	-0.1018	2.65e-05	0.00798098
cg22528123	-0.1018	0.000351419	0.0298616
cg23090046	-0.1017	0.000218259	0.0232373
cg23759710	0.1017	5.18e-07	0.000929378
cg01919885	0.1015	0.000869324	0.0464249
cg11263420	-0.1013	9.88e-05	0.0153538
cg01813965	-0.1012	0.000758716	0.0432831
cg03594868	0.1012	0.000179997	0.0209281
cg18442362	-0.1012	4.99e-08	0.000219691
cg00377497	-0.1011	0.00049159	0.0354106
cg07081759	0.1011	5.91e-05	0.011943
cg11183227	0.1011	1.02e-05	0.0048217
cg23762465	-0.101	0.000789226	0.044287
cg14663914	-0.1009	0.000321398	0.028531
cg17063143	0.1007	2.51e-07	0.000562566
cg04811205	0.1006	7.33e-05	0.0132821
cg09641127	0.1006	0.000139162	0.0183536
cg18323589	0.1006	0.000559066	0.0374733
cg15357118	0.1005	2.55e-09	3.43e-05
cg01130010	0.1004	0.000666205	0.0408428
cg14986890	-0.1004	0.000474253	0.0347046
cg02600394	0.1003	9.67e-05	0.015186
cg26631144	-0.1003	0.000504735	0.0357684
cg05744487	-0.1002	1.81e-05	0.00647393
cg21697512	-0.1002	0.000937899	0.0482761
cg23837109	-0.1002	2.01e-05	0.00694217
cg01915791	-0.1001	0.000153217	0.0193776
cg06617834	0.1001	0.000525978	0.0364294
cg25760227	-0.1001	0.000534003	0.0366387
cg13023677	-0.1	0.000233646	0.0241013
cg18493761	-0.1	0.000654236	0.0403815
cg06619077	-0.0999	1.4e-05	0.00565856
cg26562921	-0.0999	0.000707077	0.0421139
cg03056766	-0.0997	1.89e-06	0.0020924
cg00851028	0.0995	1.06e-06	0.00143271
cg12058372	0.0995	0.000285558	0.026843
cg04357717	-0.0994	0.000382686	0.031066
cg08129017	-0.0994	0.000108103	0.0160779
cg09989037	-0.0994	6.57e-05	0.0125988
cg12535642	0.0994	5.73e-07	0.000990531
cg25230327	-0.0993	4.82e-05	0.0108118
cg11218091	-0.0991	0.000232864	0.0240795
cg07962309	-0.099	3.78e-05	0.0096229
cg00534468	0.0989	1.21e-08	8.32e-05
cg19070856	-0.0988	0.000563674	0.0376674
cg14944696	-0.0987	0.000943458	0.0484228
cg06826760	0.0986	1.99e-09	3.06e-05
cg08315613	0.0986	0.000109508	0.0161914
cg23777479	0.0984	8.52e-05	0.0142492
cg01527562	-0.0983	0.000766382	0.0435244
cg21416544	0.0983	0.000861428	0.0462277
cg09479650	0.0982	0.000347017	0.0296624
cg24673765	-0.0982	0.000147745	0.0190076
cg00951869	-0.0981	7.51e-05	0.0134289
cg04324276	-0.0981	7.57e-07	0.00119815
cg05257275	0.0981	0.00077202	0.0437309
cg00975876	-0.098	0.000600824	0.0388939
cg22898082	0.0979	2.08e-06	0.00219488
cg08181850	0.0978	0.000229416	0.0238718
cg17913347	-0.0978	8.6e-05	0.0143346
cg24982682	-0.0978	0.000808814	0.0447723
cg03068346	-0.0977	3.81e-05	0.00964879
cg26344619	-0.0977	0.000333669	0.0291125
cg01407861	0.0976	0.000248379	0.0249027
cg03697881	0.0976	3.7e-05	0.00951128
cg04264726	-0.0976	0.000304794	0.0278167
cg18931633	-0.0975	1.13e-07	0.000370089
cg12487088	-0.0974	0.00058595	0.038441
cg14166131	-0.0974	1.53e-05	0.00593152
cg09743199	-0.0973	0.00089526	0.0471236
cg11481582	-0.0973	4.52e-05	0.0104648
cg16928487	-0.0973	0.000356794	0.0300781
cg27513667	0.0972	0.000160314	0.0196997
cg00030296	-0.0969	0.000366056	0.0303707
cg03899510	0.0968	0.000118591	0.0168661
cg11671335	-0.0967	0.000489054	0.0353056
cg00254470	0.0966	1.67e-05	0.00621193
cg03369999	0.0966	2.02e-05	0.00694217
cg11802797	-0.0966	0.000664456	0.0407715
cg12485428	-0.0966	0.000708837	0.0421345
cg03435698	-0.0965	0.000210893	0.0227761
cg13270236	0.0965	0.000130496	0.0178022
cg02893429	-0.0964	0.000155952	0.0194718
cg09734418	0.0964	5.94e-05	0.0119817
cg25653947	0.0964	1.46e-07	0.000433992
cg14399228	0.0963	3.64e-05	0.0094458
cg23761815	0.0963	2.41e-05	0.00762592
cg03062881	0.0962	5.57e-07	0.000978371
cg23641108	0.0962	2.63e-05	0.0079627
cg24650940	-0.0962	2.02e-07	0.000494264
cg15034393	-0.096	5.35e-07	0.000947957
cg05928581	0.0959	1.9e-05	0.00669215
cg18657751	0.0959	0.000108125	0.0160779
cg10479431	-0.0955	0.000999068	0.0497497
cg04955485	0.0954	0.000620917	0.0394492
cg08132858	-0.0954	0.000986659	0.0495153
cg15356966	-0.0953	0.000625308	0.0395667
cg04926881	-0.0952	5.04e-05	0.0111104
cg07573872	-0.0952	0.000126145	0.0175057
cg09254210	0.0952	0.00041695	0.0325332
cg07420867	0.0951	0.000642835	0.0401041
cg15818008	-0.095	0.000440737	0.0334507
cg08796240	0.0947	6.91e-05	0.0128443
cg15768324	0.0947	2.46e-07	0.00055804
cg09788778	0.0946	1.61e-05	0.00607778
cg04287259	0.0945	0.000706686	0.0421139
cg16374343	-0.0945	7.6e-06	0.00415841
cg19689330	-0.0945	9.28e-07	0.00132663
cg22158648	-0.0945	2.42e-05	0.00762592
cg27064708	-0.0945	8.45e-05	0.0141908
cg17825714	-0.0944	0.000352086	0.0299001
cg05399785	0.0943	2.07e-05	0.00702352
cg19414630	-0.0943	7.31e-05	0.0132746
cg21380024	0.0943	2.84e-06	0.00252871
cg23886355	0.0943	0.000252129	0.0251007
cg05352838	0.0942	0.000155738	0.0194576
cg13747876	0.0942	3.64e-05	0.0094458
cg20173011	0.0942	0.000852722	0.0460026
cg21988461	-0.0942	1.17e-05	0.005107
cg26246740	-0.0942	0.000314843	0.0282466
cg12449049	-0.094	3.04e-05	0.00858846
cg24425149	-0.0939	2.96e-05	0.00846635
cg01153613	0.0938	0.00020502	0.0223925
cg03769939	0.0938	1.23e-05	0.00529434
cg10502220	-0.0938	6.7e-05	0.0126596
cg26732720	-0.0938	0.000417814	0.0325676
cg08140114	0.0936	0.000736911	0.0427631
cg17296078	-0.0936	0.000917079	0.0476747
cg22945413	-0.0936	0.00100329	0.049865
cg27457201	0.0936	0.000723619	0.0425232
cg08314949	0.0935	0.00090382	0.0473387
cg14479884	-0.0935	0.000165131	0.0199719
cg02909097	0.0934	3.33e-05	0.0089951
cg14405137	-0.0934	0.000527618	0.0364707
cg19198358	-0.0934	4.92e-05	0.0109504
cg06567290	-0.0933	7.78e-05	0.0136335
cg09160589	0.0933	5.38e-06	0.00353133
cg27534520	-0.0933	0.000490975	0.0353893
cg15837838	-0.0932	0.000288288	0.0269396
cg16473915	-0.0931	0.000287793	0.0269352
cg23738760	-0.0931	0.000192366	0.0216263
cg13541353	-0.093	0.00055742	0.037435
cg20026178	-0.093	0.000179346	0.0209165
cg01938023	-0.0929	0.000412314	0.0323439
cg02018337	-0.0929	0.000961596	0.0488617
cg19348484	-0.0929	0.00018924	0.0214015
cg26943120	0.0928	0.000870447	0.0464612
cg04514047	-0.0927	1.22e-06	0.00157629
cg09588020	-0.0927	8.3e-05	0.0140936
cg17826679	0.0927	0.000725272	0.0425657
cg26676534	-0.0927	0.00100058	0.0497952
cg03998636	-0.0926	9.25e-05	0.0148335
cg21185109	-0.0926	0.000800343	0.0445733
cg25163651	0.0926	0.000403542	0.032019
cg06897661	0.0925	4.78e-06	0.00334362
cg06948435	0.0925	0.000124611	0.0173616
cg07060794	-0.0925	0.000823039	0.04514
cg18790856	-0.0924	0.000186721	0.0212688
cg25956106	0.0924	3.05e-05	0.00860239
cg00390511	-0.0923	1.74e-05	0.00632902
cg14162417	-0.0923	6.71e-06	0.00389159
cg25966016	-0.0923	8.07e-08	0.000290873
cg05261686	-0.0922	0.000262027	0.0256257
cg01870865	-0.0921	0.000535142	0.0366754
cg07777347	0.0921	0.000900437	0.047283
cg24490227	0.0921	0.00022935	0.0238718
cg27333269	0.0921	5.34e-08	0.000225564
cg04306926	0.092	6.7e-05	0.0126596
cg17884674	0.0917	0.000507632	0.0358844
cg07744502	-0.0915	0.000493727	0.0354653
cg17173423	-0.0915	0.000722149	0.0424854
cg22562498	0.0915	0.000110533	0.016265
cg25875049	-0.0915	0.000130968	0.0178383
cg01101459	0.0914	1.78e-05	0.00639587
cg17734624	-0.0913	0.000859923	0.0461871
cg22748815	0.0913	0.000180654	0.0209637
cg22571654	-0.0912	0.000286891	0.0269004
cg07748253	0.091	0.000562656	0.0376356
cg18101140	-0.091	0.000271093	0.0260551
cg16873414	-0.0909	0.000256078	0.0252837
cg03344490	-0.0907	2.16e-07	0.000519666
cg05028555	-0.0907	4.65e-05	0.0106272
cg14043527	0.0907	9.14e-07	0.00132663
cg17433678	-0.0906	0.000981601	0.0494185
cg02856688	-0.0905	0.000227657	0.0237863
cg09416188	-0.0904	4.48e-05	0.0104256
cg10301695	-0.0903	2.18e-05	0.0072165
cg20652404	-0.0903	0.000682019	0.0413154
cg25170017	0.0903	0.000577428	0.0381761
cg27061485	-0.0903	0.000437142	0.0333138
cg13972460	-0.09	0.000679263	0.0412123
cg05624954	0.0898	4.1e-05	0.0099616
cg06468072	0.0898	0.000312631	0.0281462
cg15821562	0.0897	0.000346937	0.0296617
cg02830467	-0.0896	0.000117256	0.0167629
cg15647617	0.0896	0.000188504	0.021382
cg22116041	-0.0896	0.000136658	0.0181684
cg03618113	-0.0895	0.000100769	0.0155463
cg04323925	0.0895	5.35e-07	0.000947957
cg03303585	-0.0894	0.000178018	0.0208255
cg08672956	0.0894	2.15e-05	0.00717386
cg13702222	0.0893	6.82e-05	0.0127771
cg17443007	-0.0893	0.000660074	0.040598
cg20922701	-0.0893	0.000622156	0.0394627
cg15148088	-0.0892	0.000106374	0.0159487
cg26200118	-0.0892	0.000725714	0.0425681
cg13264543	-0.0891	0.000858944	0.0461871
cg23258615	-0.0891	0.000920518	0.0477793
cg13980454	-0.089	0.000772808	0.0437467
cg25325512	-0.089	5.37e-05	0.0114238
cg03646542	0.0889	3.76e-07	0.00075865
cg05579598	-0.0889	0.000918183	0.0477054
cg08782002	-0.0888	4.2e-05	0.0100913
cg09524686	-0.0888	0.000789278	0.044287
cg18449389	-0.0888	0.000168939	0.0202392
cg21748244	0.0888	9.6e-05	0.0151053
cg00275103	0.0887	0.000205679	0.0224411
cg07646791	-0.0887	0.000753419	0.0431454
cg13008174	-0.0887	0.000585655	0.038441
cg21932513	0.0887	9.14e-08	0.000313197
cg01612140	-0.0886	0.000144946	0.0187992
cg05573654	0.0886	3.52e-06	0.00281637
cg18369972	-0.0886	1.59e-05	0.00603179
cg23009042	-0.0885	0.000242063	0.0246026
cg01244342	0.0884	1.03e-05	0.00485437
cg15892280	-0.0884	1.63e-06	0.00187722
cg17662034	0.0884	0.000415727	0.0324924
cg06154903	0.0883	1.57e-06	0.00184914
cg06575692	0.0883	0.000345618	0.0296094
cg18771737	-0.0883	2.17e-05	0.00720377
cg15454110	0.0882	0.000626618	0.0396067
cg24804768	-0.088	0.00023683	0.0242926
cg26690127	-0.088	0.000177989	0.0208255
cg05862438	-0.0879	0.000131978	0.0178991
cg08463297	-0.0879	0.000651847	0.0402935
cg12338137	-0.0878	0.000939342	0.0483115
cg14828411	0.0878	0.000296607	0.0274197
cg15679064	-0.0878	0.000634972	0.0398635
cg02068690	0.0877	5.97e-06	0.00362278
cg24304210	-0.0877	0.000982992	0.0494614
cg07148145	0.0874	7.39e-05	0.0133119
cg22660904	0.0874	0.000705084	0.0420644
cg19557110	0.0873	0.000759393	0.0433003
cg25621991	-0.0873	0.000455967	0.0339913
cg09505513	0.0871	1.82e-06	0.00203191
cg17848797	-0.0871	0.000689761	0.0416035
cg21073459	-0.0871	0.000447413	0.0337326
cg22636056	0.0871	6.33e-08	0.000249541
cg12620005	-0.0869	0.000162994	0.0198687
cg23684410	-0.0869	0.000176572	0.0207143
cg21281463	-0.0867	0.000846463	0.045795
cg23146741	-0.0867	0.000981658	0.0494185
cg08305575	-0.0866	0.000968963	0.0490572
cg08811509	-0.0866	4.55e-08	0.000207602
cg10651583	-0.0866	4.37e-05	0.0102865
cg14876117	-0.0866	0.000317793	0.0283834
cg12594244	-0.0865	0.000401126	0.0318845
cg21429551	-0.0865	0.000656267	0.0404476
cg08422803	0.0864	6.49e-06	0.00381165
cg07333305	-0.0863	9.75e-05	0.0152417
cg17812664	-0.0863	9.1e-05	0.0146956
cg18181703	-0.0863	0.000267658	0.0258929
cg06100147	-0.0862	0.000759702	0.0433039
cg06881914	-0.0862	0.000723107	0.0425166
cg01418188	-0.086	0.00023711	0.0243034
cg03931865	0.0859	8.78e-06	0.00450809
cg21451906	-0.0859	7.73e-05	0.0136076
cg23057220	0.0858	0.000778607	0.0439661
cg27305460	-0.0858	0.000575863	0.0381433
cg13719443	-0.0857	7.38e-06	0.00411222
cg21937128	-0.0856	0.000342701	0.0294804
cg10802680	0.0855	0.000119504	0.0169465
cg17969271	-0.0855	5.39e-05	0.0114467
cg21946631	-0.0855	0.000375269	0.0307444
cg20981615	0.0854	0.000186361	0.0212566
cg13765621	-0.0853	0.000788993	0.044287
cg17611046	-0.0853	0.000152993	0.0193551
cg22684041	-0.0853	0.000602702	0.038925
cg01671681	-0.0851	0.000109092	0.0161413
cg17839611	0.0851	0.000322085	0.0285455
cg00920892	0.085	0.00013277	0.0179021
cg13772414	0.085	0.000302264	0.0276886
cg20349598	-0.085	0.000121519	0.0170964
cg18045973	0.0848	5.37e-05	0.0114238
cg24328944	-0.0848	3.54e-06	0.00281648
cg03776194	0.0847	7.1e-05	0.0130589
cg04716447	0.0847	0.000330575	0.0290033
cg18151262	0.0847	7.62e-09	6.65e-05
cg03915055	-0.0846	1.72e-05	0.00630931
cg08995061	-0.0846	8.46e-05	0.0141908
cg06372654	-0.0845	1.42e-06	0.00174651
cg20477147	-0.0845	2.99e-06	0.00257637
cg26588061	-0.0845	0.000734753	0.0427136
cg09807356	0.0844	0.000416407	0.0325133
cg13485718	-0.0844	0.00060197	0.0389096
cg16690845	-0.0844	1.02e-05	0.00481609
cg09489567	0.0843	0.000138918	0.0183405
cg22295925	-0.0843	0.000326598	0.0287641
cg04232816	0.0842	8.83e-05	0.0145296
cg00130947	-0.0841	4.04e-05	0.00992416
cg00684594	-0.084	2.29e-06	0.00230366
cg12332239	0.084	0.000188175	0.021361
cg15742777	-0.084	0.000446157	0.0336683
cg19525078	-0.0839	2.58e-05	0.00787727
cg11136562	0.0838	5.6e-06	0.00358311
cg18282388	-0.0838	5.7e-05	0.0117283
cg14173033	-0.0837	0.000482733	0.0350169
cg18022893	-0.0837	0.000130013	0.0177668
cg18404652	0.0837	0.000390061	0.0313541
cg22290528	0.0837	0.000965518	0.0489598
cg14145074	0.0836	0.000148302	0.0190339
cg10495683	-0.0835	0.000557007	0.0374253
cg11393173	-0.0835	0.000223409	0.0235435
cg04807561	0.0834	0.000736689	0.0427631
cg16743273	0.0834	9.3e-07	0.00132663
cg17342588	-0.0834	0.000450494	0.0338264
cg04051335	-0.0833	0.000108511	0.0161043
cg07677157	-0.0832	0.000821168	0.0450859
cg13204181	0.0832	0.000416299	0.0325133
cg17330097	0.0832	0.000175898	0.0206876
cg18247172	0.0832	2.26e-06	0.00228693
cg01092213	-0.0831	0.0009809	0.0494074
cg06947286	-0.0831	2.25e-05	0.00737181
cg19604369	0.0831	0.000411345	0.0323434
cg08289839	0.083	0.00033445	0.0291425
cg12306057	-0.083	5.55e-05	0.0115909
cg17931986	-0.083	1.5e-06	0.00181711
cg00112260	0.0828	0.000192868	0.0216632
cg08698997	-0.0828	0.000190201	0.0214638
cg13800005	-0.0828	3.85e-06	0.00297388
cg22153181	-0.0828	0.000146618	0.0189268
cg00782811	0.0827	6.06e-05	0.0121367
cg25841625	-0.0827	0.000127717	0.0176348
cg27262041	-0.0827	9.63e-05	0.0151331
cg06164260	-0.0826	3.68e-05	0.00949367
cg06710464	0.0826	0.000320442	0.0285305
cg12542656	-0.0826	5.3e-05	0.0113629
cg02543993	0.0825	0.000327984	0.0288436
cg03276401	-0.0825	2.95e-05	0.00844923
cg25289803	-0.0825	3.7e-05	0.00951128
cg13253439	0.0824	4.57e-05	0.0105229
cg17306706	0.0824	0.000724456	0.042548
cg26547058	0.0824	8.18e-09	6.84e-05
cg11867491	0.0823	1.77e-07	0.000477153
cg13831124	-0.0823	0.000751712	0.043113
cg17186163	-0.0823	4.68e-05	0.0106837
cg21533897	-0.0823	2.37e-07	0.00054846
cg04121771	-0.0822	3.47e-05	0.00919998
cg18700940	-0.0822	2.98e-07	0.000638739
cg26853401	-0.0822	7.15e-05	0.0131074
cg23222247	0.0821	0.000130233	0.0177838
cg01427471	-0.082	0.000181167	0.0209844
cg12619262	0.082	0.000762571	0.0433964
cg19735804	-0.0819	7.46e-05	0.0133806
cg13492227	-0.0816	0.000650003	0.0402331
cg26795312	0.0816	0.000362406	0.0302482
cg04891053	-0.0815	8.79e-05	0.0144993
cg02086839	0.0813	0.000548241	0.0371348
cg07014072	-0.0813	0.000182919	0.0210492
cg14499058	-0.0813	4.94e-05	0.0109617
cg22039357	-0.0813	0.000111476	0.0163409
cg09421562	-0.0812	1.06e-06	0.00143271
cg09643139	-0.0812	0.000345468	0.0296094
cg24298409	0.0812	8.92e-07	0.00132663
cg11169848	-0.0811	0.000949366	0.048609
cg26194212	-0.081	0.00057413	0.0380558
cg21696677	0.0809	1.76e-06	0.00200162
cg00519063	-0.0808	0.000200576	0.0221443
cg02560388	-0.0808	1.32e-06	0.00165921
cg06096336	0.0808	0.00019214	0.0216068
cg07512258	0.0808	0.000452413	0.0338653
cg15049177	0.0808	0.000512462	0.0360167
cg24019564	0.0808	3.1e-05	0.00866169
cg26667287	0.0808	9.34e-06	0.00460902
cg03819286	0.0807	0.000127112	0.0176101
cg08168580	-0.0807	0.000959564	0.0488119
cg26874764	-0.0807	6.63e-05	0.012652
ch.14.1488981R	-0.0807	1.92e-07	0.000486476
cg03309393	-0.0806	3.91e-05	0.00978163
cg17727579	-0.0806	3.4e-06	0.00276154
cg04481722	-0.0805	4.42e-06	0.00322027
cg15787227	0.0804	1.06e-08	7.59e-05
cg05554543	-0.0803	3.28e-05	0.00894481
cg12927730	0.0802	9.25e-05	0.0148335
cg16397176	-0.0801	9.07e-05	0.0146668
cg03612357	-0.08	0.000242719	0.0246367
cg18200389	-0.0799	2.02e-05	0.00694217
cg26470501	-0.0799	6.18e-06	0.00372657
cg07904073	-0.0798	5.32e-05	0.0113772
cg17418387	0.0798	4.55e-05	0.0105083
cg27149388	-0.0798	0.00012845	0.0176871
cg03536404	0.0797	5.82e-06	0.00359881
cg01582532	0.0796	2.46e-06	0.00238673
cg02082462	-0.0796	0.000967204	0.0490264
cg24067911	-0.0796	0.000474916	0.0347288
cg25166437	-0.0796	0.000614076	0.0392666
cg08314457	-0.0795	0.000384351	0.0311157
cg26801613	-0.0795	0.00065236	0.0403133
cg27292079	-0.0795	9.53e-05	0.01504
cg18059012	0.0794	0.000263234	0.0256537
cg27601695	-0.0794	4.93e-06	0.00336266
cg03237324	-0.0793	0.00058838	0.03851
cg06015525	0.0793	0.000413742	0.0323917
cg11254522	0.0793	0.000498247	0.0355921
cg07035242	0.0792	0.000373807	0.0306788
cg07122805	-0.0792	0.00100149	0.0498171
cg10578938	0.0792	0.000305035	0.0278251
cg16886414	0.079	0.000487484	0.0352162
cg17250262	0.079	0.000531685	0.0365764
cg17984638	0.079	0.000840921	0.0455719
cg21435473	-0.079	0.000835338	0.045452
cg26562462	-0.079	5.79e-08	0.000234437
cg10588135	-0.0789	0.000919248	0.047737
cg12792931	0.0789	9.5e-05	0.0150164
cg23383149	0.0789	0.000829044	0.0452923
cg00799387	0.0788	6.75e-05	0.0127075
cg06484100	-0.0788	0.00010529	0.0158719
cg11118962	-0.0788	7.6e-05	0.0135296
cg11783364	-0.0788	0.000978275	0.0493076
cg11207300	-0.0787	2.4e-09	3.35e-05
cg26501007	-0.0786	0.000138107	0.0182685
cg05044994	0.0785	5.34e-06	0.0035144
cg10893667	0.0785	0.000132376	0.0179021
cg01741041	0.0784	1.77e-05	0.00638247
cg02886838	-0.0783	0.000151978	0.0192851
cg14097619	-0.0783	0.000107039	0.0160188
cg06921176	-0.0782	5.29e-05	0.0113603
cg13701509	0.0782	1.39e-05	0.00563998
cg16651877	-0.0782	6.84e-05	0.0127879
cg25625514	-0.0782	0.000417767	0.0325676
cg27205941	-0.0782	3.01e-05	0.00856698
cg01322555	-0.0781	3.16e-07	0.000663101
cg05557266	-0.0781	0.000451193	0.0338395
cg13765961	0.0781	0.000321086	0.028531
cg19215266	0.0781	0.000151543	0.0192709
cg05544807	0.078	1.49e-05	0.00584688
cg09641325	-0.078	3.61e-05	0.00942855
cg11330465	0.078	8.19e-05	0.0139869
cg13139542	0.078	1.4e-05	0.00565338
cg14114297	-0.078	0.000527057	0.0364612
cg21281007	0.0779	7.78e-05	0.0136335
cg25695041	-0.0779	9.08e-09	7.13e-05
cg25814969	-0.0779	0.000580049	0.0382541
cg08362785	0.0778	0.000268409	0.0259104
cg20566766	-0.0778	0.000607483	0.0390411
cg21254939	-0.0778	1.32e-05	0.00547398
cg25983901	-0.0778	4.19e-05	0.0100806
cg13409077	-0.0777	0.00100495	0.0498881
cg23646614	-0.0777	0.000607897	0.0390434
cg24179445	-0.0777	0.00090795	0.0474262
cg15018704	0.0776	1.25e-08	8.42e-05
cg14997707	-0.0775	2.11e-05	0.007106
cg24973755	0.0775	0.000813224	0.0449391
cg00382930	0.0774	0.0002869	0.0269004
cg12273325	-0.0773	9.27e-06	0.00460902
cg23280999	0.0773	1.31e-05	0.00547398
cg25614701	-0.0773	5.95e-06	0.00362269
cg02495395	-0.0772	5.78e-05	0.0118086
cg06430309	0.0772	0.000227683	0.0237863
cg07589273	-0.0772	8.02e-05	0.0138269
cg10056728	0.0772	0.000155444	0.0194469
cg04691264	0.0771	3.43e-06	0.00276972
cg20842915	-0.0771	4.11e-05	0.0099616
cg26794364	-0.0771	1.75e-05	0.00633537
cg03277652	-0.077	3.65e-05	0.0094458
cg03998606	-0.077	0.000312624	0.0281462
cg16555466	-0.077	3.19e-05	0.00881205
cg22872634	-0.077	1.95e-05	0.00681583
cg10255544	0.0769	1.27e-06	0.001613
cg14058851	0.0769	1.48e-05	0.00582518
cg24773560	0.0769	0.00047245	0.034659
cg25153233	-0.0769	0.000274968	0.0262275
cg26647929	-0.0769	1.18e-06	0.00153031
cg01198111	0.0768	7.21e-05	0.013167
cg23740474	0.0768	0.000593949	0.0386584
cg02076355	-0.0767	3.1e-07	0.000654052
cg03565274	-0.0767	0.000904531	0.0473486
cg06650206	-0.0767	1.06e-09	2.12e-05
cg21241410	-0.0767	0.000149184	0.0190812
cg25356697	-0.0767	0.000541382	0.0369034
cg01248445	-0.0766	1.57e-05	0.00597979
cg09843907	0.0766	5.32e-05	0.0113772
cg11336061	0.0766	2.99e-06	0.00257637
cg25554212	0.0766	2.28e-05	0.00742381
cg27370104	0.0766	1e-05	0.00478877
cg27511678	0.0766	0.000712177	0.0422424
cg25922329	-0.0765	0.000308137	0.0279576
cg08563299	-0.0764	0.000996516	0.0497111
cg11977605	-0.0764	0.00032782	0.0288413
cg11409837	-0.0763	0.000515681	0.0361114
cg15872437	-0.0763	0.000449258	0.0337986
cg07986378	-0.0762	0.000498384	0.0355921
cg20671910	0.0762	0.000117157	0.0167629
cg22129276	-0.0762	0.000211222	0.02279
cg24341911	-0.0762	0.00099469	0.0496678
cg07150145	-0.0761	0.000130126	0.017775
cg12758090	0.0761	0.000974347	0.0492224
cg14959260	0.076	0.000603906	0.038949
cg17999505	-0.076	0.000996375	0.0497111
cg22876894	-0.076	7.3e-06	0.00409045
cg03523538	0.0758	0.000590337	0.0385571
cg12473916	-0.0758	8.69e-05	0.0144185
cg02641539	-0.0757	9.01e-05	0.0146553
cg07570498	-0.0757	0.000314668	0.0282466
cg09287933	0.0757	0.000377013	0.0308269
cg20522675	0.0757	0.000687718	0.0415343
cg07671221	-0.0756	6.05e-05	0.0121221
cg07835154	0.0756	7.94e-06	0.00429097
cg09002358	-0.0756	8.77e-05	0.0144928
cg09063936	-0.0756	0.00094421	0.0484376
cg18125510	-0.0756	0.000558158	0.0374613
cg19308663	0.0756	0.000837168	0.0454687
cg19736900	-0.0756	8.66e-05	0.0143869
cg04509559	-0.0755	4.25e-08	0.000197269
cg08079052	-0.0755	3.8e-06	0.00294973
cg18330338	0.0755	0.00026685	0.0258495
cg27351675	-0.0755	8.96e-06	0.00452877
cg03901454	-0.0754	1.38e-05	0.00561357
cg05768005	-0.0754	0.000894578	0.047111
cg10383428	0.0754	3.73e-05	0.00956609
cg11878955	-0.0754	0.000365115	0.0303287
cg12315466	0.0754	0.000112362	0.016393
cg13315706	0.0754	7.9e-05	0.0137555
cg19203115	-0.0754	0.000504477	0.0357675
cg14161821	-0.0753	5.5e-05	0.0115318
cg16513984	0.0753	1.03e-05	0.00484359
cg20597877	0.0753	0.000105296	0.0158719
cg23042148	-0.0753	0.000658072	0.0405106
cg23342148	-0.0753	0.000167565	0.0201487
cg26303870	0.0753	9.67e-06	0.00469841
cg16683060	-0.0752	1.91e-07	0.000486122
cg01300096	0.0751	0.000222463	0.0234971
cg08324925	-0.075	0.00081794	0.0450151
cg08830672	0.075	0.000366978	0.0303748
cg09502149	-0.075	0.000165558	0.0199889
cg12341429	-0.075	6.22e-06	0.00373777
cg18030105	0.075	7.91e-08	0.000290034
cg00645010	-0.0749	4.99e-05	0.0110509
cg24487489	0.0749	0.000483406	0.0350404
cg08415156	0.0748	0.000669353	0.0409563
cg13222915	-0.0748	0.000349092	0.0297486
cg16545743	-0.0748	0.000498252	0.0355921
cg25704749	-0.0748	0.00013048	0.0178022
cg00095259	-0.0747	2.71e-05	0.00806015
cg02079413	0.0747	0.0001799	0.0209269
cg16176694	-0.0747	0.000644221	0.0401109
cg21814870	-0.0747	0.000118275	0.0168327
cg08791347	0.0746	0.000604394	0.0389493
cg18050634	0.0746	2.44e-05	0.00766488
cg19743721	0.0746	0.00017167	0.0204136
cg01899624	-0.0745	0.000118633	0.0168664
cg13499324	-0.0745	0.000184954	0.0211804
cg19015711	-0.0745	3.1e-06	0.00262035
cg02805025	-0.0744	7.2e-05	0.013167
cg13030582	-0.0744	0.000346306	0.0296304
cg01015663	-0.0742	0.000421147	0.0326773
cg02716826	-0.0742	0.000620421	0.0394492
cg05398036	-0.0742	0.00017657	0.0207143
cg07555102	0.0742	4.01e-06	0.00303578
cg19734822	0.0742	4.79e-05	0.010777
cg23327334	-0.0742	5.33e-06	0.0035144
cg12838902	0.0741	0.000391217	0.0313921
cg14427590	0.0741	0.000459066	0.0340645
cg14776016	-0.0741	0.000103774	0.0157876
cg15090899	0.074	4.69e-05	0.010688
cg23108037	0.074	0.000209729	0.0227051
cg26120073	0.074	4.22e-05	0.0101179
cg26537568	0.074	1.06e-05	0.00492079
cg06647068	-0.0739	5.13e-06	0.00344711
cg13630239	0.0739	0.000359431	0.0302047
cg04031093	-0.0737	7.81e-05	0.0136485
cg04612203	0.0737	1.36e-05	0.00556723
cg13300580	0.0737	0.000114769	0.0165764
cg14114546	-0.0737	0.000420339	0.0326514
cg19714737	-0.0737	0.000233755	0.0241013
cg22277567	0.0737	0.000531678	0.0365764
cg25376491	-0.0737	0.000225839	0.0236781
cg26348226	-0.0737	0.00024917	0.0249461
cg00969680	0.0735	4.28e-05	0.0101614
cg05220114	-0.0735	0.000634759	0.0398566
cg05726118	0.0735	0.000778707	0.0439661
cg13136716	-0.0735	0.000410592	0.0322964
cg16294668	-0.0735	0.000943189	0.0484149
cg18156592	-0.0734	0.000186433	0.0212566
cg08447387	0.0733	0.000366437	0.0303748
cg15908708	-0.0733	0.000323104	0.0286027
cg18101225	-0.0733	7.49e-09	6.65e-05
cg26552621	0.0733	7.98e-05	0.0138172
cg04727071	-0.0732	0.000191364	0.021566
cg15044270	-0.0732	0.000768095	0.0435784
cg21468035	-0.0732	0.000777359	0.0439151
cg00514486	-0.0731	0.000277712	0.0264119
cg04243368	-0.0731	0.000825226	0.0451833
cg09816821	0.0731	0.000608208	0.0390513
cg18586277	-0.0731	0.000653426	0.0403494
cg03492094	0.073	3.19e-06	0.00266074
cg03845363	-0.073	4.41e-05	0.0103463
cg04958252	0.073	1.01e-05	0.00479099
cg15277311	-0.073	1.87e-09	3.01e-05
cg17953816	-0.073	0.000621535	0.0394627
cg25269388	-0.073	6.42e-06	0.00378649
cg00813509	0.0729	0.000330297	0.0289899
cg00832457	-0.0729	9.19e-05	0.0147589
cg04010205	0.0729	0.000333055	0.0291046
cg07283441	0.0729	0.000696296	0.0418042
cg11958668	0.0729	4.05e-05	0.00992858
cg26957187	-0.0729	2e-05	0.00693161
cg06636203	0.0728	0.000102056	0.0156487
cg07450219	-0.0728	0.000335777	0.0291973
cg08585897	0.0728	9.51e-06	0.00465297
cg09400566	0.0728	2.5e-05	0.00774681
cg19081843	-0.0728	0.00020083	0.0221666
cg21331324	-0.0728	0.000794181	0.0443956
cg02246992	0.0727	0.000284155	0.0267793
cg23446514	-0.0727	0.00014773	0.0190076
cg05948411	-0.0726	0.000720024	0.0424309
cg15394630	-0.0726	0.000900775	0.0472935
cg16594502	-0.0726	4.72e-05	0.0107135
cg20893022	-0.0726	0.000393104	0.0315017
cg25061289	-0.0726	0.000210092	0.0227185
cg10879992	-0.0725	1.94e-06	0.00211256
cg03771282	0.0724	1.86e-05	0.00658504
cg04137490	0.0724	1.33e-05	0.0054983
cg10836733	0.0724	0.000171782	0.0204159
cg21574271	-0.0724	3.88e-05	0.00976341
cg23530553	-0.0724	0.000482886	0.0350169
cg10790747	-0.0723	0.000208158	0.0226171
cg13374432	-0.0723	0.000709299	0.0421345
cg14980255	-0.0723	0.000400569	0.0318506
cg18259342	-0.0723	0.000722405	0.0424854
cg20651995	-0.0723	0.000534369	0.0366405
cg25132241	0.0723	0.000228117	0.0238019
cg07168939	-0.0722	0.000100953	0.0155595
cg07469815	-0.0722	0.000226249	0.023701
cg11415156	-0.0722	0.000893365	0.0471069
cg13712852	-0.0722	0.000227249	0.0237647
cg16395183	-0.0722	0.000784378	0.0441386
cg21754746	-0.0722	9.47e-05	0.0149931
cg11821200	0.0721	0.00081562	0.0449819
cg14292522	-0.0721	0.000121945	0.0171391
cg23140706	-0.0721	0.000647808	0.0401806
cg02820958	-0.072	1.64e-07	0.000458269
cg22032137	-0.072	0.000578046	0.0381761
cg00754063	0.0719	1.32e-05	0.00547398
cg09113070	-0.0719	0.00022716	0.0237614
cg11474778	-0.0719	4.65e-06	0.00330885
cg02771673	0.0718	0.000929961	0.0480189
cg04988978	-0.0718	0.000243122	0.0246489
cg19328485	-0.0718	0.000713563	0.0422702
cg03778398	-0.0717	0.000614383	0.0392666
cg06091804	-0.0717	6.65e-06	0.00387535
cg14734668	-0.0717	0.000214634	0.0230273
cg09318283	-0.0716	2.34e-05	0.0075385
cg14391247	-0.0716	0.00025309	0.025146
cg17589437	-0.0716	0.000319991	0.0285305
cg25786273	0.0716	0.000246957	0.0248198
cg00920254	-0.0715	0.000208385	0.0226359
cg06524757	-0.0715	0.000179093	0.0208928
cg09666573	-0.0715	0.00021566	0.0230934
cg15025240	-0.0715	1.07e-05	0.00494254
cg26158270	-0.0715	0.000118204	0.0168327
cg00569418	-0.0714	7.27e-05	0.0132435
cg17258816	-0.0714	0.000107028	0.0160188
cg24690479	-0.0714	0.000754544	0.0431858
cg13617280	0.0713	6.29e-05	0.0123216
cg24000908	-0.0713	0.000129402	0.0177456
cg12535090	0.0712	0.000121313	0.0170946
cg12782294	-0.0712	6.91e-05	0.0128443
cg21837323	0.0712	0.000492953	0.0354563
cg22077962	0.0712	7.26e-05	0.0132298
cg04206572	0.0711	0.000900199	0.047283
cg11804414	0.0711	0.000263485	0.0256618
cg14889653	0.0711	1.44e-07	0.000433992
cg16799737	-0.0711	0.000257067	0.0253275
cg20813374	-0.0711	3.04e-05	0.00858994
cg22779651	-0.0711	0.000186916	0.0212827
cg26623554	-0.0711	0.000319404	0.0284968
cg27569829	0.0711	0.000708441	0.0421345
cg00335735	-0.071	0.000348863	0.0297351
cg10189661	0.071	7.38e-05	0.0133119
cg15964523	0.071	0.000190691	0.0215044
cg10531986	0.0709	0.000244177	0.0246978
cg12242502	0.0709	0.000521457	0.036303
cg13112407	-0.0709	6.81e-05	0.012766
cg18234111	-0.0709	0.00036467	0.0302977
cg22800477	-0.0709	3.82e-08	0.00018344
cg23167259	-0.0709	4.96e-07	0.000901524
cg01277162	-0.0708	0.00026994	0.0259921
cg06235429	0.0708	0.000119807	0.0169713
cg17732216	0.0708	0.000438518	0.0333568
cg27301488	0.0708	0.000197639	0.0219518
cg06411447	0.0707	1.56e-07	0.000439933
cg10596692	-0.0707	0.000245641	0.0247555
cg24006547	0.0707	8.6e-05	0.0143346
cg25800753	-0.0707	3.13e-06	0.00264159
cg00558718	-0.0706	4.61e-09	4.94e-05
cg22144450	0.0706	7.22e-07	0.00116597
cg09319020	0.0704	0.000177229	0.0207681
cg18495191	-0.0704	4.96e-06	0.00336266
cg02976539	0.0703	2.21e-05	0.00728151
cg12862231	-0.0703	0.000494521	0.0354857
cg21198755	-0.0703	0.000244056	0.0246978
cg22104103	-0.0703	0.000607768	0.0390411
cg23968893	-0.0703	0.000639272	0.0399953
cg27087650	-0.0703	0.000975007	0.0492422
cg00607627	-0.0702	2.37e-06	0.00235444
cg08843248	0.0702	0.000229573	0.0238823
cg09888026	-0.0702	1.87e-05	0.00661163
cg14565781	-0.0702	0.000481613	0.0349894
cg17373759	-0.0702	0.000982435	0.0494457
cg25213452	-0.0702	3.41e-06	0.00276154
cg05521150	-0.0701	3.31e-05	0.00898348
cg07634645	-0.0701	0.000668343	0.0409259
cg09887955	-0.0701	2.36e-05	0.00757559
cg25422405	0.0701	0.000787462	0.0442466
cg27072545	-0.0701	0.000163763	0.0198986
cg19477793	-0.07	0.000696793	0.0418138
cg00169184	0.0699	1.59e-06	0.00186801
cg03590328	0.0699	0.000202718	0.0222329
cg17004025	-0.0699	0.000267928	0.0259034
cg22796363	0.0699	0.000305181	0.0278278
cg23709172	-0.0699	0.000219451	0.0232756
cg27407935	-0.0699	5.09e-05	0.01117
cg00517080	0.0698	0.000427523	0.0329641
cg01500140	0.0698	0.000935569	0.0482311
cg10812247	-0.0698	0.00011361	0.0164963
cg12282552	0.0698	0.000408381	0.032183
cg19508285	-0.0698	0.000305732	0.0278489
cg04730825	-0.0697	0.000987882	0.0495588
cg09405340	0.0697	0.000325848	0.0287525
cg11832534	0.0697	2.19e-08	0.000123928
cg03593823	-0.0696	0.000940062	0.0483115
cg18562121	-0.0696	0.000189032	0.0213976
cg23623851	0.0696	7.72e-05	0.0136005
cg11945292	-0.0695	8.85e-06	0.00452527
cg17618987	0.0695	0.000174284	0.0205846
cg23414595	-0.0695	0.000615544	0.039287
cg25015038	-0.0695	0.000746531	0.0429691
cg02710530	0.0694	6.81e-06	0.00392594
cg05072552	0.0694	1.23e-07	0.000388406
cg12441066	-0.0694	0.000429583	0.0330226
cg07607074	0.0693	3.76e-05	0.00960935
cg13072943	-0.0693	0.000968807	0.0490572
cg17467525	-0.0693	3.08e-05	0.00863347
cg22572614	-0.0693	0.00069944	0.0418876
cg00050692	-0.0692	0.000129948	0.0177668
cg00719668	-0.0692	0.000753834	0.0431545
cg14334350	0.0692	0.000178293	0.0208401
cg22898362	0.0692	0.000482291	0.0350108
cg25749254	0.0692	0.000455905	0.0339913
cg01891736	0.0691	1.04e-05	0.00487479
cg24609094	0.0691	0.000357261	0.030101
cg02291556	-0.069	0.0010001	0.049781
cg08622923	0.069	9.57e-05	0.0150704
cg02045948	-0.0689	2.64e-06	0.0024567
cg02389949	-0.0689	0.000875874	0.0466496
cg24860589	-0.0689	0.000887505	0.0469876
cg26675379	0.0689	0.000411188	0.0323372
cg08548444	-0.0688	0.000321132	0.028531
cg11628739	-0.0688	0.000936849	0.0482494
cg08277548	-0.0687	0.000284202	0.0267793
cg22972055	0.0687	0.000502989	0.0357343
cg01782024	0.0686	0.000160408	0.0196997
cg18919659	0.0686	3.85e-05	0.00972069
cg19795292	-0.0686	0.00026426	0.0256939
cg04164640	-0.0685	5.84e-05	0.0118806
cg07862889	-0.0685	7.83e-05	0.0136619
cg16202419	-0.0685	2.62e-06	0.0024567
cg17465423	-0.0685	0.000107034	0.0160188
cg03267442	0.0684	0.000835652	0.0454557
cg06262098	0.0684	1.13e-05	0.00505068
cg04793268	-0.0683	0.000830033	0.0453017
cg27333426	-0.0683	0.000153949	0.0194102
cg13472656	-0.0682	2.48e-07	0.000559875
cg01350996	0.0681	0.000792753	0.0443591
cg04343971	0.0681	0.000431459	0.033103
cg05044173	0.0681	0.000255795	0.0252729
cg14103123	0.0681	0.0001311	0.0178383
cg16463880	0.0681	3.01e-05	0.00856698
cg17839366	-0.0681	0.000764447	0.0434676
cg23620184	0.0681	6.66e-05	0.012652
cg24029430	-0.0681	9.55e-05	0.0150579
cg27303735	-0.0681	0.000862606	0.0462612
cg02666020	0.068	6.69e-05	0.0126596
cg06094745	0.068	0.000634109	0.0398566
cg07149179	-0.068	0.000411908	0.0323439
cg24113496	-0.068	1.85e-09	3.01e-05
cg27552493	-0.068	0.000896486	0.0471525
cg03988700	-0.0679	0.000592657	0.0386284
cg05649724	-0.0679	0.000614063	0.0392666
cg08840913	-0.0679	0.00016316	0.0198831
cg06759518	0.0678	0.000281762	0.0266335
cg16249105	-0.0678	0.00051598	0.0361263
cg26914296	-0.0678	0.000957285	0.0487824
cg19374752	-0.0677	0.000735881	0.0427446
cg19750657	0.0677	0.00053624	0.0367184
cg03717755	0.0676	0.000529966	0.0365303
cg03882382	-0.0676	0.000481502	0.0349894
cg03940776	-0.0676	2.7e-06	0.00247445
cg06597413	0.0676	2.93e-06	0.00257412
cg11229101	0.0676	1.73e-07	0.000469029
cg12478185	-0.0676	0.000192458	0.0216271
cg17395211	0.0676	0.000568694	0.0378465
cg22197936	-0.0676	0.000561729	0.0375975
cg01415058	-0.0675	1.17e-05	0.00511963
cg10104487	-0.0675	0.000859716	0.0461871
cg21556389	-0.0675	0.000272803	0.0261414
cg10932916	-0.0674	0.000249481	0.0249635
cg15339075	-0.0674	0.000437978	0.033346
cg25771113	-0.0674	0.000114387	0.01657
cg04086394	0.0673	2.67e-09	3.49e-05
cg06379214	0.0673	0.000136383	0.018155
cg17094249	-0.0673	8.96e-06	0.00452877
cg23623251	-0.0673	0.000242643	0.024635
cg24366564	0.0673	6.68e-05	0.0126596
cg20962215	-0.0672	7.3e-05	0.0132746
cg23264429	-0.0672	0.000993384	0.0496382
cg23590202	-0.0672	0.000315921	0.0283174
cg25376310	-0.0672	0.000329736	0.028949
cg05155047	0.0671	1.17e-05	0.005107
cg13563132	-0.0671	0.000952853	0.0486481
cg14478589	-0.0671	0.0003821	0.0310407
cg25818882	-0.0671	0.000384167	0.0311157
cg26987697	-0.067	1.98e-05	0.00689271
cg10714509	-0.0669	0.000111969	0.0163586
cg13010869	-0.0669	0.000642668	0.0400998
cg18006637	-0.0669	4.33e-05	0.01022
cg20033652	0.0669	0.000275019	0.0262275
cg03734026	0.0668	0.000158967	0.0196123
cg10318313	0.0668	9.4e-09	7.13e-05
cg18447785	-0.0668	0.000992435	0.0496382
cg20488673	-0.0668	0.000176216	0.0207104
cg00529697	-0.0667	0.000314207	0.0282199
cg02904344	-0.0667	0.000747566	0.0429818
cg09974780	0.0667	0.000674521	0.0410711
cg18661379	-0.0667	0.000317521	0.0283833
cg19635926	0.0667	1.29e-05	0.00543819
cg19640821	-0.0667	0.00100495	0.0498881
cg25296374	-0.0666	0.00018777	0.0213509
cg19776453	0.0665	1.7e-05	0.00627653
cg05303899	0.0664	0.000553668	0.0373029
cg08575122	-0.0664	6.73e-09	6.25e-05
cg10416593	-0.0664	0.000287816	0.0269352
cg18354836	0.0664	0.000908363	0.047437
cg00078299	-0.0663	0.000450629	0.0338264
cg09064491	-0.0663	0.000729411	0.0426287
cg10917426	0.0663	2.61e-05	0.0079299
cg11448683	-0.0663	0.000101772	0.0156249
cg12997627	0.0663	2.2e-07	0.000523773
cg20775254	-0.0663	0.00080618	0.0446916
cg21919820	0.0663	0.000591362	0.0385801
cg04147593	-0.0662	0.000604465	0.0389493
cg15781504	-0.0662	0.000703705	0.0420181
cg18931398	0.0662	4.71e-06	0.00333826
cg25500196	-0.0662	3.91e-05	0.00978163
cg08938793	-0.0661	8.75e-07	0.00130578
cg09083279	0.0661	0.000922494	0.0478316
cg11072627	-0.0661	0.00020052	0.0221441
cg01266707	-0.066	0.000285712	0.026843
cg10951117	0.066	7.22e-06	0.0040722
cg22407942	-0.066	0.000887752	0.0469935
cg01439112	-0.0659	0.000675033	0.0410824
cg02018681	0.0659	8.13e-05	0.0139372
cg06123753	-0.0659	0.0003177	0.0283834
cg07944862	-0.0659	0.000655524	0.0404192
cg09248934	-0.0659	4.93e-06	0.00336266
cg25428213	0.0659	4.31e-06	0.00317417
cg26281107	-0.0659	0.000240179	0.0245044
cg00864768	-0.0658	0.000881135	0.0468019
cg07266580	-0.0658	0.000823126	0.04514
cg09080120	0.0658	2.56e-06	0.00242507
cg14084689	-0.0658	4.11e-06	0.00309962
cg25599761	-0.0658	0.000768376	0.0435784
cg02352391	-0.0657	0.000771379	0.0437131
cg05712938	-0.0657	0.000819822	0.0450501
cg22052056	-0.0657	0.000412422	0.0323439
cg26763362	-0.0657	0.000151851	0.0192851
cg06438056	-0.0656	3.69e-05	0.00950301
cg18376497	-0.0656	0.000491933	0.0354216
cg25609393	-0.0656	0.000453288	0.0339125
cg03308803	0.0655	7.99e-05	0.0138207
cg06520450	-0.0655	4.17e-07	0.000796289
cg07521929	-0.0655	0.000621916	0.0394627
cg19881557	0.0655	0.000167605	0.0201487
cg27226927	0.0655	6.86e-06	0.00394681
cg02432444	-0.0654	1.09e-05	0.00498234
cg02619205	-0.0654	5.51e-05	0.0115372
cg03395188	0.0654	6.17e-05	0.0122511
cg08723977	-0.0654	1.29e-06	0.00162803
cg17445157	-0.0654	4.41e-06	0.00322027
cg22896917	-0.0654	0.000717469	0.04234
cg05905184	-0.0653	9.09e-05	0.0146835
cg12658897	0.0653	0.000229707	0.0238843
cg17023419	0.0653	7.1e-05	0.0130589
cg24240870	-0.0653	0.000141751	0.0185505
cg24807889	-0.0653	5.98e-05	0.0120277
cg25727671	-0.0653	0.000332735	0.029084
cg25964728	-0.0653	0.000489192	0.0353094
cg12537003	0.0652	9.13e-05	0.0147266
cg20660269	0.0652	0.000504608	0.0357675
cg00634665	-0.0651	0.000404696	0.0320625
cg04705952	-0.0651	0.000114229	0.0165556
cg07321536	-0.0651	4.09e-05	0.00995878
cg10133462	0.0651	0.000188669	0.0213891
cg16694480	0.0651	0.000268112	0.0259034
cg17977099	-0.0651	0.000201414	0.0221725
cg20682720	-0.0651	0.000338564	0.0293186
cg24218620	-0.0651	0.000990839	0.0496382
cg24620635	0.0651	3.29e-05	0.00895956
cg02711724	0.065	2.15e-05	0.00717796
cg05900955	0.065	1.6e-05	0.00605143
cg14023350	-0.065	0.000726176	0.0425787
cg08726522	-0.0649	0.000577826	0.0381761
cg13364311	-0.0649	0.000500207	0.0356454
cg13706315	0.0649	0.000356845	0.0300781
cg15919066	-0.0649	0.000222503	0.0234971
cg01283343	-0.0648	0.000389339	0.0313322
cg06837308	-0.0648	0.000584199	0.0384016
cg13790259	0.0648	2.33e-05	0.0075168
cg01086110	-0.0647	7.74e-05	0.013615
cg12686273	-0.0647	3.73e-05	0.00955389
cg13876960	-0.0647	0.000134572	0.0179999
cg18900669	-0.0647	1e-06	0.00139294
cg20201128	-0.0647	0.000408064	0.0321641
cg20393620	-0.0647	4.87e-05	0.0108925
cg14012686	0.0646	0.000966462	0.0489958
cg23665802	-0.0645	8.36e-05	0.014132
cg03062196	-0.0644	8.91e-05	0.0146089
cg10140728	-0.0644	1.39e-05	0.00564009
cg10708955	-0.0644	0.000624199	0.0395256
cg21509105	-0.0644	0.000287363	0.0269255
cg21637826	-0.0644	3.64e-05	0.0094458
cg25961567	0.0644	0.000101047	0.0155652
cg00665106	-0.0643	0.000210179	0.0227185
cg04267691	-0.0643	0.000278576	0.0264701
cg05317090	-0.0643	1.07e-05	0.00493212
cg09240747	0.0643	2.12e-05	0.00711653
cg15130054	-0.0643	0.000309999	0.0280104
cg16384170	-0.0643	3.32e-05	0.0089951
cg08168141	-0.0642	0.000729416	0.0426287
cg08198983	-0.0642	3.83e-05	0.00969181
cg15259986	-0.0642	0.00045869	0.0340645
cg25838150	-0.0642	6.41e-05	0.012442
cg03612039	-0.0641	6.97e-05	0.0129312
cg06542681	0.0641	0.000299757	0.0275717
cg10434728	0.0641	0.000422719	0.0327571
cg21589375	0.0641	0.00080174	0.0445933
cg26262576	-0.0641	0.00052549	0.0364139
cg10536529	-0.064	0.000325516	0.0287293
cg12917475	-0.064	0.000640177	0.0400258
cg12978253	-0.064	0.000105024	0.0158537
cg19258062	-0.064	0.000653938	0.0403744
cg10146402	-0.0639	0.000129135	0.0177328
cg24664957	0.0639	0.000835009	0.0454469
cg25437359	-0.0639	0.000694889	0.0417682
cg04425710	0.0638	0.000190715	0.0215044
cg17740632	-0.0638	0.000233465	0.0241005
cg03238687	0.0637	0.000293839	0.0272573
cg05988548	-0.0637	0.000804898	0.044649
cg12483947	-0.0637	5.59e-05	0.0116221
cg15450981	-0.0637	0.000100283	0.0154848
cg15650745	-0.0637	0.000519766	0.0362474
cg15812469	-0.0637	1.68e-05	0.00622797
cg24525988	-0.0637	0.000437831	0.0333409
cg26826117	0.0637	0.00034197	0.0294435
cg11947187	-0.0636	0.000397644	0.0317438
cg16349667	0.0636	5.39e-05	0.0114467
cg19377250	-0.0636	0.000562663	0.0376356
cg03461784	-0.0635	0.000440036	0.0334191
cg07483304	-0.0635	1.05e-05	0.00491136
cg07571745	0.0635	0.000683483	0.0413562
cg12141611	-0.0635	6.14e-07	0.00103904
cg13478668	-0.0635	0.000211096	0.0227823
cg15647311	-0.0635	7.93e-05	0.0137653
cg20120939	-0.0635	0.000342609	0.0294786
cg06496666	0.0633	0.000863956	0.0462709
cg12740037	-0.0633	9.63e-06	0.00468967
cg14903245	-0.0633	0.000231145	0.0239683
cg17980786	0.0633	0.000449176	0.0337985
cg05167429	-0.0632	0.000339634	0.0293515
cg05445008	0.0632	0.000412077	0.0323439
cg13426340	0.0632	3.21e-05	0.00883816
cg18113453	0.0632	7.51e-05	0.0134289
cg14925328	0.0631	0.00065073	0.0402581
cg17657737	-0.0631	3.61e-05	0.00942879
cg18195986	0.0631	2.71e-07	0.000595959
cg01341655	-0.063	0.000304406	0.0277985
cg07071764	-0.063	0.000234879	0.0241458
cg10901633	-0.063	0.00055852	0.0374613
cg11016847	0.063	0.000105422	0.0158848
cg19331221	-0.063	1.62e-06	0.00187722
cg01636582	-0.0629	0.000429143	0.0330203
cg04482712	0.0629	0.000694114	0.0417396
cg13451356	0.0629	0.000893937	0.047111
cg14630032	-0.0629	0.000846081	0.0457862
cg21225804	-0.0629	0.000636721	0.0399074
cg22881435	0.0629	2.14e-06	0.00222778
cg24150157	0.0629	9.94e-06	0.00478877
cg04295094	0.0628	7.36e-05	0.0133119
cg22345878	-0.0628	0.000107537	0.0160647
cg26450574	0.0628	0.000109664	0.016203
cg02381390	-0.0627	2.57e-05	0.00786756
cg02661034	-0.0627	0.000930495	0.0480347
cg16316519	-0.0627	3.01e-06	0.00258362
cg21302812	0.0627	0.000358064	0.0301401
cg22776912	-0.0627	3.7e-05	0.00951128
cg27001534	-0.0627	5.65e-06	0.00358311
cg06843030	-0.0626	7.9e-10	1.94e-05
cg10426062	0.0626	0.000519791	0.0362474
cg22135704	0.0626	0.000323977	0.0286419
cg26144070	0.0626	4.49e-05	0.0104354
cg21368479	-0.0625	2.41e-05	0.00762592
cg24153813	-0.0625	2.65e-06	0.0024567
cg25349939	0.0625	2.28e-05	0.00742381
cg00472520	0.0624	0.000824288	0.0451801
cg01862311	-0.0624	7.13e-05	0.0130978
cg03217360	0.0624	6.98e-06	0.00399078
cg13745870	-0.0624	0.000357844	0.0301319
cg21030400	0.0624	0.000802281	0.0446056
cg06946797	-0.0623	0.000863835	0.0462709
cg07046101	-0.0623	0.000817243	0.0450064
cg16001422	-0.0623	1.01e-05	0.00479099
cg17202948	-0.0623	0.000129722	0.0177668
cg17483523	-0.0623	0.00047595	0.0347558
cg24531955	-0.0623	0.000299565	0.0275621
cg13823964	-0.0622	0.000218903	0.0232557
cg14457132	-0.0622	0.000279141	0.0264936
cg21469505	-0.0622	0.000786462	0.044232
cg19534149	-0.0621	8.7e-06	0.00447949
cg09244707	-0.062	0.000690455	0.0416214
cg13235761	0.062	0.000874271	0.0465879
cg25214158	-0.062	0.000288628	0.0269447
cg03164561	0.0619	5.13e-06	0.00344711
cg04995846	-0.0619	0.000129318	0.0177399
cg15095917	-0.0619	8.89e-06	0.00452877
cg17749033	-0.0619	0.000816067	0.0449819
cg20000132	0.0619	0.000129162	0.0177328
cg20911180	-0.0619	0.000285063	0.0268121
cg00095276	-0.0618	0.000416512	0.0325133
cg01834225	-0.0618	6.36e-06	0.00378437
cg01860753	-0.0618	3.27e-08	0.000169294
cg10845147	0.0618	0.00053704	0.0367513
cg24212268	-0.0618	1.84e-07	0.000481638
cg07974890	-0.0617	9e-05	0.0146543
cg23679344	-0.0617	0.000757466	0.043259
cg26831488	-0.0617	0.000338643	0.0293186
cg20529923	-0.0616	0.000583667	0.0383891
cg22199361	-0.0616	0.000181049	0.0209844
cg26996818	-0.0616	7.65e-05	0.0135599
cg02117086	-0.0615	0.000183416	0.0210631
cg04434896	-0.0615	0.00013152	0.0178603
cg11817899	-0.0615	8.72e-05	0.014438
cg25788793	-0.0615	0.000353082	0.0299479
cg03426888	-0.0614	0.000176168	0.0207104
cg04864609	-0.0614	3.77e-06	0.00293261
cg14962159	0.0614	9.07e-08	0.000313197
cg24807169	-0.0614	3.52e-05	0.00928696
cg25291978	0.0614	0.000305411	0.0278366
cg00583731	0.0613	1.22e-06	0.0015792
cg15896624	-0.0613	0.000166507	0.0200669
cg18232125	-0.0613	0.000146826	0.0189393
cg19088503	-0.0613	2.95e-05	0.00844923
cg26309498	0.0613	7.38e-05	0.0133119
cg02668248	0.0612	9.72e-05	0.0152155
cg11119313	-0.0612	0.000803351	0.0446187
cg13468041	-0.0612	6.64e-05	0.012652
cg14734916	0.0612	0.00022438	0.0236065
cg27160284	0.0612	0.00028953	0.0270014
cg04392554	0.0611	0.000615239	0.0392802
cg09453076	0.0611	0.000183425	0.0210631
cg10274208	-0.0611	7.61e-06	0.00415841
cg11947857	0.0611	3.96e-05	0.00982841
cg15775674	-0.0611	0.000825229	0.0451833
cg06534752	0.061	7.43e-05	0.0133616
cg07267600	-0.061	7.76e-05	0.0136233
cg24136318	0.061	1.07e-05	0.00494254
cg24163575	-0.061	9.25e-06	0.00460666
cg02725453	0.0609	6.99e-06	0.00399078
cg05402854	-0.0609	0.000680728	0.041262
cg15354065	-0.0609	0.000165419	0.0199889
cg06221861	-0.0608	0.000787594	0.0442481
cg07773593	-0.0608	0.000446584	0.0336945
cg11465766	0.0608	5.61e-07	0.000981933
cg12229979	0.0608	8.48e-05	0.0142056
cg26971042	-0.0608	3.92e-05	0.00978163
cg00651497	-0.0607	0.000794083	0.0443956
cg17855595	0.0607	6.64e-05	0.012652
cg18603276	-0.0607	1.44e-05	0.00576012
cg02650017	-0.0606	2.6e-15	1.09e-09
cg03027241	-0.0606	6.56e-05	0.0125916
cg14989316	-0.0606	0.000102893	0.0157136
cg03989068	-0.0605	2.07e-05	0.00702352
cg05377839	-0.0605	0.000522212	0.0363283
cg16618104	-0.0605	1.92e-05	0.00672829
cg18244508	0.0605	9.64e-05	0.0151489
cg26086785	0.0605	0.000334863	0.0291437
cg04542489	-0.0604	2.69e-05	0.00803548
cg06728793	-0.0604	0.000628885	0.0397035
cg14742079	-0.0604	0.000225308	0.0236506
cg16929959	-0.0604	0.000390297	0.031367
cg21108085	-0.0604	0.000734599	0.0427117
cg24829313	-0.0604	0.000616175	0.0392994
cg24884230	-0.0604	6.8e-06	0.00392594
cg26393393	0.0604	1.45e-05	0.00576012
cg08761535	-0.0603	0.000545086	0.0370269
cg10379653	0.0603	7.81e-06	0.00424158
cg10950251	-0.0603	0.000346657	0.0296485
cg24550880	0.0603	0.000378517	0.0308956
cg02485922	0.0602	7.67e-05	0.0135676
cg07528595	-0.0602	3.94e-05	0.0097837
cg13917614	0.0602	0.000527376	0.036466
cg16905822	0.0602	0.000512391	0.0360167
cg18181034	-0.0602	0.000831004	0.0453046
cg21780428	0.0602	2.85e-05	0.00829864
cg04707715	0.0601	0.000749141	0.0430128
cg07888912	-0.0601	0.000124485	0.017356
cg16469419	0.0601	3.05e-06	0.00259843
cg21990700	-0.0601	0.000356068	0.0300528
cg26549114	0.0601	1.92e-06	0.00211256
cg03747456	-0.06	3e-05	0.00853803
cg09800748	-0.06	0.000802282	0.0446056
cg12278474	-0.06	0.000438408	0.0333545
cg13917964	-0.06	0.000588407	0.03851
cg14023774	0.06	0.000233051	0.0240795
cg14222140	0.06	7.54e-06	0.00414615
cg15613100	0.06	1.07e-06	0.00144176
cg20176142	-0.06	0.000298511	0.0275075
cg24843003	0.06	0.000729662	0.0426287
cg07086224	0.0599	2.5e-05	0.00774681
cg19501502	0.0599	3.88e-05	0.00976341
cg00397871	0.0598	0.000976907	0.0492743
cg03989617	-0.0598	4.69e-05	0.0106837
cg08409562	-0.0598	0.000794777	0.0443962
cg14134019	0.0598	0.000118229	0.0168327
cg18618815	-0.0598	0.000202867	0.0222329
cg22234419	-0.0598	0.000404704	0.0320625
cg26943759	0.0598	2.18e-05	0.00722751
cg01619533	0.0597	2.16e-09	3.12e-05
cg02255484	-0.0597	0.000784766	0.0441545
cg02297838	-0.0597	7.04e-05	0.0130039
cg07386061	0.0597	0.000717988	0.0423596
cg07709210	-0.0597	0.000715863	0.0423175
cg09106231	-0.0597	0.00016854	0.020232
cg17064520	-0.0597	0.000412429	0.0323439
cg17804886	0.0597	0.000110544	0.016265
cg23393728	-0.0597	0.000467489	0.0344448
cg26185531	-0.0597	4.17e-09	4.71e-05
cg14091531	0.0596	0.000504241	0.0357675
cg14295960	0.0596	0.000546937	0.0370945
cg15534212	-0.0596	1.06e-05	0.00492079
cg18817955	-0.0596	0.000249009	0.024942
cg04332373	-0.0595	2.54e-05	0.00781502
cg09812990	-0.0595	0.000798194	0.0444959
cg09853238	-0.0595	0.000452001	0.0338586
cg10143543	0.0595	0.000284915	0.0268121
cg15128876	0.0595	0.000428857	0.0330203
cg16551670	-0.0595	0.000295382	0.027364
cg17222143	-0.0595	6.85e-05	0.0128019
cg18258980	-0.0595	6.35e-05	0.0123698
cg23632791	-0.0595	1.29e-05	0.00543819
cg00058291	-0.0594	0.000883766	0.0468847
cg01609688	-0.0594	3.39e-06	0.00276062
cg03485667	-0.0594	0.00036191	0.0302376
cg03818307	-0.0594	0.000172176	0.0204454
cg05638500	-0.0594	0.000290385	0.0270691
cg06824423	0.0594	2.56e-07	0.000569726
cg04513311	0.0593	0.000173043	0.0205075
cg08810238	-0.0593	7.06e-05	0.0130295
cg16258888	-0.0593	0.000142398	0.0185905
cg20729991	0.0593	7.65e-05	0.0135599
cg05400196	0.0592	0.000321096	0.028531
cg08801710	-0.0592	1.73e-05	0.00631083
cg12138695	-0.0592	5.13e-06	0.00344711
cg16362481	0.0592	0.00063858	0.039964
cg18507365	-0.0592	6.15e-05	0.012238
cg21604697	0.0592	0.000644858	0.0401131
cg23044564	-0.0592	1.65e-05	0.00617738
cg25338531	-0.0592	0.000952025	0.048631
cg26915370	-0.0591	5.61e-05	0.0116315
cg04022194	0.059	0.000157154	0.0195095
cg05045702	0.059	0.000115532	0.0166459
cg06367321	-0.059	3.31e-05	0.00898348
cg08085199	0.059	8.13e-05	0.0139372
cg17820495	0.059	0.000330853	0.0290088
cg19323059	-0.059	0.000796613	0.0444442
cg24735210	-0.059	3.06e-05	0.00860754
cg00751332	-0.0589	0.000157229	0.019513
cg04205715	0.0589	0.000421149	0.0326773
cg10309957	-0.0589	0.000333406	0.0291125
cg13977486	-0.0589	0.000561991	0.037609
cg14571194	-0.0589	0.000622145	0.0394627
cg16893868	-0.0589	0.000733831	0.0427041
cg19086497	-0.0589	7.53e-05	0.0134392
cg21719817	0.0589	0.000288228	0.0269396
cg26152038	-0.0589	3.62e-05	0.00944291
cg00033551	0.0588	0.000529234	0.036522
cg00262061	0.0588	7.15e-05	0.0131074
cg02412345	-0.0588	0.000280789	0.0265837
cg06399735	-0.0588	1.78e-05	0.00639587
cg06728055	-0.0588	0.000140507	0.018457
cg25843927	-0.0588	0.000951576	0.048631
cg02881189	-0.0587	0.000637264	0.0399294
cg02886033	-0.0587	0.000118155	0.0168327
cg19270739	-0.0587	0.000271892	0.0261002
cg22532475	0.0587	1.42e-05	0.00570685
cg25139843	-0.0587	0.000821073	0.0450859
cg13824385	0.0586	0.000263501	0.0256618
cg17260706	-0.0586	6.47e-06	0.00380216
cg22014398	-0.0586	1.92e-05	0.00674226
cg25349276	-0.0586	1.91e-07	0.000486122
cg00688820	0.0585	1.72e-07	0.000468533
cg03664011	-0.0585	0.000801503	0.0445887
cg07612655	-0.0585	0.000587735	0.0384983
cg10381440	-0.0585	0.000692062	0.0416698
cg19759788	-0.0585	9.37e-05	0.014929
cg21078330	-0.0585	0.000272115	0.0261027
cg23615483	0.0585	0.000765484	0.0435038
cg03129324	-0.0584	0.000685273	0.0414345
cg06487369	0.0584	0.00032346	0.0286204
cg09639771	-0.0584	6.21e-05	0.012267
cg10189605	-0.0584	1.84e-07	0.000481638
cg01094309	-0.0583	0.000585648	0.038441
cg04205664	-0.0583	3.34e-05	0.0090008
cg04314225	0.0583	7.75e-05	0.0136182
cg20288927	0.0583	0.00029756	0.0274389
cg05310309	-0.0582	0.000445859	0.033658
cg07078732	0.0582	0.000757379	0.043259
cg14235273	0.0582	1.56e-05	0.00597979
cg25333225	-0.0582	2.53e-08	0.000140254
cg01955153	-0.0581	4.76e-06	0.00334362
cg03860038	0.0581	0.000792581	0.0443591
cg07379813	0.0581	0.000222318	0.02349
cg15639951	0.0581	2.75e-05	0.00812463
cg21351437	-0.0581	1.54e-05	0.00593816
cg14172126	-0.058	0.000646709	0.040166
cg18881723	-0.058	0.000814147	0.0449484
cg20090782	-0.058	0.000297184	0.0274323
cg25461300	-0.058	0.000917413	0.0476832
cg27295118	-0.058	0.000111496	0.0163409
cg07267166	-0.0579	2.76e-08	0.000149393
cg26184028	-0.0579	0.000312945	0.028161
cg08782481	-0.0578	0.000382153	0.0310407
cg11276172	0.0578	1.57e-05	0.0059971
cg27095222	-0.0578	0.000102264	0.0156633
cg00101457	0.0577	0.000936076	0.0482312
cg01670430	-0.0577	0.000361264	0.0302069
cg03029755	-0.0577	0.000504358	0.0357675
cg10415171	-0.0577	0.000285681	0.026843
cg24635112	0.0577	0.000971017	0.0491136
cg05617127	-0.0576	1.28e-05	0.00542511
cg07551364	-0.0576	0.000845829	0.0457785
cg08877257	0.0576	0.000880673	0.0467859
cg08922729	-0.0576	0.000579947	0.0382533
cg09994445	0.0576	3.47e-06	0.00279769
cg16736826	-0.0576	0.000892004	0.047087
cg01004017	0.0575	0.000191631	0.0215786
cg02307597	0.0575	0.000233704	0.0241013
cg06758448	-0.0575	7e-08	0.000266178
cg08284926	0.0575	0.000445472	0.0336409
cg12799029	-0.0575	0.000478819	0.034895
cg14008998	-0.0575	0.000473054	0.0346656
cg16963286	-0.0575	0.000555736	0.0373699
cg26677549	-0.0575	2.55e-06	0.00242507
cg15484354	-0.0574	0.000175415	0.0206586
cg16073236	-0.0574	4.79e-05	0.010777
cg00177142	-0.0573	0.000600794	0.0388939
cg02304134	0.0573	1.25e-05	0.00532559
cg03050965	0.0573	0.000803073	0.0446187
cg03434029	-0.0573	6.16e-05	0.0122503
cg05304979	0.0573	0.000731482	0.0426606
cg09233395	-0.0573	0.000346358	0.0296304
cg10792660	-0.0573	5.15e-05	0.0112242
cg12827798	-0.0573	9.05e-05	0.0146637
cg02765418	0.0572	7.48e-06	0.0041378
cg10245910	-0.0572	0.000175321	0.0206586
cg12434362	-0.0572	2.3e-05	0.00745242
cg17008454	0.0572	0.000622168	0.0394627
cg17768691	-0.0572	0.000217744	0.0232121
cg24038192	0.0572	0.000745567	0.0429527
cg25344064	-0.0572	0.000572561	0.037988
cg00073090	-0.0571	0.000708823	0.0421345
cg08548498	-0.0571	0.000760403	0.0433143
cg10791580	-0.0571	0.000130703	0.0178188
cg13590456	-0.0571	1.24e-05	0.00530937
cg19806398	0.0571	0.00023007	0.0239043
cg23210424	-0.0571	0.000181582	0.0209898
cg23606396	0.0571	0.00014333	0.0186462
cg26115816	-0.0571	4.79e-06	0.00334362
cg06102690	-0.057	0.000334726	0.0291437
cg09900893	-0.057	0.000962027	0.0488777
cg10381071	-0.057	0.000160471	0.0196997
cg15007228	-0.057	0.00038845	0.0312968
cg19554294	-0.057	5.14e-05	0.0112242
cg20798677	-0.057	0.000203477	0.0222706
cg20919730	-0.057	0.000420187	0.0326456
cg26709300	0.057	0.000637978	0.0399533
cg00160018	0.0569	2.02e-07	0.000494264
cg00522451	-0.0569	3.03e-06	0.00258833
cg03239970	-0.0569	0.000993057	0.0496382
cg05134616	-0.0569	3.01e-06	0.00258362
cg12753606	-0.0569	3.98e-09	4.65e-05
cg22807822	-0.0569	0.000740939	0.0428697
cg24778896	-0.0569	0.000487445	0.0352162
cg27634991	-0.0569	4.15e-05	0.0100197
cg08462055	0.0568	0.000735861	0.0427446
cg10897631	-0.0568	8.19e-06	0.0043696
cg19537070	-0.0568	0.000523722	0.0363522
cg19714332	-0.0568	3.48e-05	0.00920767
cg22563937	-0.0568	0.000795997	0.0444272
cg00524374	-0.0567	7.64e-05	0.0135539
cg01149053	0.0567	6.32e-05	0.0123375
cg07969918	-0.0567	0.000817617	0.0450065
cg14387452	-0.0567	1.02e-05	0.0048217
cg15551096	-0.0567	0.000226759	0.0237431
cg19776793	0.0567	0.000147898	0.0190097
cg27382459	0.0567	1.76e-05	0.00636891
cg01776825	-0.0566	0.000916104	0.0476534
cg02065148	0.0566	1.3e-06	0.00164298
cg02127215	-0.0566	1.18e-05	0.00514097
cg03623401	-0.0566	0.000533079	0.0366241
cg07521618	0.0566	9.97e-05	0.015437
cg07913503	0.0566	0.000159493	0.0196598
cg14259466	0.0566	3.19e-05	0.00881205
cg19405484	-0.0566	5.8e-05	0.0118431
cg25103160	-0.0566	0.000353024	0.0299479
cg27243685	0.0566	4.98e-09	5.21e-05
cg04742397	-0.0565	5.3e-06	0.0035144
cg27494897	-0.0565	0.000250131	0.0249984
cg01637169	0.0564	0.000482942	0.0350169
cg02773698	-0.0564	0.000311179	0.0280712
cg11945905	0.0564	7.5e-05	0.0134287
cg01089060	-0.0563	9.56e-09	7.13e-05
cg05844366	0.0563	3.79e-05	0.00962585
cg21703988	0.0563	3.6e-05	0.00942855
cg03183540	-0.0562	4.5e-05	0.0104492
cg05958910	0.0562	0.000213061	0.0229115
cg06762532	-0.0562	4.03e-05	0.00992416
cg10283036	0.0562	5.2e-05	0.0112848
cg10495164	0.0562	2.84e-06	0.00252871
cg16082737	-0.0562	2.55e-08	0.000140254
cg17460386	0.0562	0.000473393	0.0346659
cg21211645	0.0562	7.79e-05	0.0136335
cg21282452	-0.0562	0.000771224	0.0437103
cg22981296	-0.0562	0.000374455	0.0307055
cg27200429	-0.0562	0.000174506	0.0205961
cg27226043	-0.0562	0.000320772	0.028531
cg02507296	-0.0561	0.000904856	0.0473486
cg07622533	0.0561	0.000426803	0.0329271
cg08744727	0.0561	0.000233555	0.0241005
cg18241337	-0.0561	0.000245081	0.0247263
cg23626862	0.0561	0.00082838	0.0452797
cg08005992	-0.056	3.91e-08	0.00018344
cg14371153	-0.056	5.9e-05	0.011936
cg19321695	0.0559	0.00038744	0.0312384
cg02258846	-0.0558	0.000184889	0.0211788
cg08369576	0.0558	0.000434436	0.0332034
cg09701102	0.0558	3.94e-05	0.0097837
cg12344104	0.0558	0.000650288	0.0402388
cg13978929	-0.0558	4.62e-05	0.0105919
cg24014795	-0.0558	0.000280222	0.0265648
cg25152348	0.0558	2.44e-05	0.00766627
cg01935221	0.0557	6.19e-05	0.0122511
cg10107264	-0.0557	0.000372972	0.0306377
cg12423493	-0.0557	0.00047625	0.0347655
cg14973892	-0.0557	0.0009799	0.0493776
cg18753958	-0.0557	0.000172679	0.0204818
cg01179256	0.0556	0.000870231	0.0464556
cg06547285	-0.0556	0.00096978	0.0490748
cg20747565	-0.0556	0.000867717	0.0463865
cg21051031	0.0556	0.000197424	0.0219481
cg02250708	-0.0555	0.000172728	0.0204818
cg03438909	-0.0555	0.000460211	0.0341251
cg07320941	-0.0555	0.00025672	0.0253081
cg13094252	-0.0555	0.00092815	0.0479669
cg14986215	-0.0555	0.0003398	0.0293515
cg22675453	-0.0555	3.59e-08	0.000178416
cg23888440	-0.0555	0.000679247	0.0412123
cg06706159	0.0554	0.000201774	0.0221927
cg08058213	-0.0554	0.000646674	0.040166
cg10025200	-0.0554	0.000132205	0.017901
cg11001739	0.0554	2.65e-05	0.00797593
cg15704225	-0.0554	0.000512845	0.0360167
cg16488580	0.0554	0.000261014	0.0255566
cg21518151	0.0554	0.000113468	0.016491
cg25860737	0.0554	0.000244343	0.0246978
cg27663123	0.0554	0.000141304	0.0185268
cg01889461	-0.0553	3.43e-05	0.00913408
cg05214676	0.0553	0.00013389	0.0179666
cg09538921	0.0553	0.000179527	0.020926
cg10157558	0.0553	2.49e-05	0.00774681
cg12305753	-0.0553	0.000251395	0.02507
cg14843731	-0.0553	0.000303119	0.0277486
cg02307586	-0.0552	0.000893691	0.047111
cg08881610	-0.0552	0.000126309	0.0175227
cg14979593	-0.0552	0.000128812	0.017717
cg15499275	0.0552	6.08e-05	0.0121367
cg19385725	-0.0552	0.000105458	0.0158848
cg02658551	-0.0551	0.000781393	0.0440375
cg02768760	0.0551	0.000532644	0.0366183
cg06285333	0.0551	0.000859612	0.0461871
cg06296597	0.0551	2.24e-05	0.00734713
cg13189486	-0.0551	2.11e-06	0.0022139
cg16439823	-0.0551	0.000108672	0.0161126
cg17629264	0.0551	0.00050348	0.035742
cg01876978	-0.055	8.3e-05	0.0140936
cg02917867	-0.055	0.000591702	0.0385904
cg13162577	-0.055	0.000419141	0.0326046
cg21730533	0.055	0.000431923	0.0331074
cg22396792	-0.055	0.000389552	0.0313433
cg01819512	-0.0549	8.94e-05	0.0146194
cg08732418	0.0549	2.61e-05	0.0079299
cg16101493	-0.0549	0.000672846	0.0410103
cg26118698	0.0549	0.000149618	0.0191133
cg08555160	-0.0548	1.34e-05	0.00550911
cg17000128	-0.0548	0.000343004	0.0294879
cg17022038	0.0548	1.18e-07	0.000377961
cg21035356	-0.0548	7.52e-07	0.00119756
cg24020986	-0.0548	0.000398362	0.0317705
cg24678869	0.0548	0.000742918	0.042891
cg01403532	0.0547	0.000595264	0.0386769
cg02031634	-0.0547	5.63e-06	0.00358311
cg05355381	-0.0547	0.000646996	0.0401675
cg17357062	0.0547	0.000390967	0.0313863
cg23514375	-0.0547	0.000897551	0.0472026
cg08534055	0.0546	0.000323571	0.0286208
cg09981533	0.0546	0.000781768	0.044051
cg10724928	-0.0546	0.000152713	0.0193373
cg17475857	-0.0546	0.000880379	0.0467762
cg19464419	-0.0546	0.00021535	0.0230775
cg21962204	-0.0546	0.000197677	0.0219518
cg26561207	-0.0546	0.000823605	0.0451604
cg03907612	-0.0545	1.85e-05	0.00656801
cg12781678	0.0545	0.000794362	0.0443956
cg18555411	0.0545	5.96e-06	0.00362269
cg18882687	-0.0545	0.000395896	0.0316343
cg19516359	0.0545	2.99e-05	0.00853803
cg26140475	-0.0545	9.22e-05	0.0147974
cg03411334	0.0544	0.000446993	0.0337131
cg10851251	-0.0544	0.000822906	0.0451399
cg11155784	-0.0544	0.000643732	0.0401057
cg15275309	-0.0544	1.14e-06	0.00149517
cg17446958	0.0544	0.000208859	0.022652
cg22787719	-0.0544	0.000602499	0.0389239
cg23824902	0.0544	1.15e-05	0.00507621
cg26206456	-0.0544	0.000710772	0.042183
cg03211173	-0.0543	5.96e-06	0.00362269
cg12382846	0.0543	0.000336486	0.0292439
cg23101680	-0.0543	0.000403325	0.0320078
cg03955589	-0.0542	0.000296023	0.0273991
cg07254421	-0.0542	0.000943008	0.0484144
cg09262100	0.0542	0.000480635	0.0349608
cg13202410	-0.0542	0.000387758	0.0312531
cg13354241	0.0542	9.7e-05	0.0152019
cg22737478	-0.0542	1.34e-05	0.00550911
cg10512376	-0.0541	0.0010045	0.0498834
cg11310639	-0.0541	0.000225355	0.0236506
cg15128312	-0.0541	0.000450588	0.0338264
cg26004710	0.0541	7.38e-05	0.0133119
cg07138452	-0.054	1.41e-05	0.00566532
cg08290850	-0.054	0.00100719	0.0499438
cg16813466	-0.054	0.000841728	0.0456004
cg26353859	-0.054	0.000333684	0.0291125
cg02751731	0.0539	0.00046252	0.0342302
cg04890934	-0.0539	0.00100594	0.0499195
cg05731560	0.0539	1.11e-05	0.0050139
cg05895618	-0.0539	0.000772603	0.043741
cg12736206	0.0539	0.000243135	0.0246489
cg13462829	-0.0539	0.000996748	0.0497112
cg20666307	-0.0539	0.000295804	0.0273849
cg08268892	0.0538	1.96e-06	0.00212495
cg09159223	0.0538	0.000154743	0.0194114
cg10050487	0.0538	3.99e-05	0.00987363
cg13759852	-0.0538	2.78e-05	0.00817906
cg18785742	0.0538	3.77e-05	0.00961296
cg18998938	-0.0538	1.02e-05	0.0048232
cg21496518	-0.0538	0.000423797	0.0327961
cg23851932	0.0538	7.92e-05	0.0137615
cg26650359	-0.0538	0.000193338	0.0216817
cg01123250	0.0537	0.000351089	0.0298616
cg04921068	-0.0537	2.99e-05	0.00853803
cg12160087	0.0537	0.000418269	0.0325693
cg14269525	-0.0537	0.000104095	0.0157876
cg27460547	-0.0537	2.49e-05	0.00774681
cg04471375	0.0536	9.91e-05	0.0153776
cg08040824	-0.0536	2.06e-06	0.00219014
cg18855104	-0.0536	0.000267693	0.0258929
cg23226387	0.0536	8e-07	0.00124531
cg03449621	-0.0535	0.000902644	0.0473157
cg13134297	-0.0535	0.000127333	0.0176164
cg18772573	0.0535	0.000158297	0.0195718
cg22607339	-0.0535	0.000565385	0.0377182
cg22909901	0.0535	0.000467611	0.0344477
cg00472445	-0.0534	1.11e-06	0.00147397
cg00950718	-0.0534	9.41e-05	0.014964
cg01657995	-0.0534	3.49e-05	0.00922391
cg04062622	-0.0534	2.88e-05	0.00831539
cg06774039	-0.0534	4.42e-06	0.00322027
cg07229212	-0.0534	0.000991114	0.0496382
cg14163311	0.0534	0.000903577	0.0473387
cg19991723	-0.0534	0.000574729	0.0380835
cg24069188	-0.0534	0.000489926	0.035338
cg00316080	-0.0533	0.000986153	0.0494968
cg09897604	-0.0533	0.000681372	0.0412882
cg20702121	0.0533	8.33e-05	0.0141162
cg22209601	0.0532	4.02e-05	0.00991644
cg27034836	-0.0532	0.000256227	0.0252855
cg01401336	0.0531	2.22e-07	0.000523773
cg12946560	0.0531	0.000273387	0.0261553
cg17408637	0.0531	0.000162421	0.0198393
cg19618622	-0.0531	3.25e-05	0.00890034
cg21217221	-0.0531	0.000460796	0.0341624
cg26432869	-0.0531	0.000345699	0.0296103
cg26571814	-0.0531	5.43e-05	0.0114614
cg07319459	0.053	0.000320282	0.0285305
cg08539067	-0.053	1.17e-14	2.45e-09
cg10953312	-0.053	2.07e-05	0.00702352
cg17208360	-0.053	1.08e-05	0.00495743
cg19583076	-0.053	0.000248273	0.0248982
cg25385819	0.053	0.000204415	0.0223572
cg05411199	0.0529	4.81e-06	0.00334394
cg05622422	0.0529	0.000427325	0.0329552
cg21502695	-0.0529	0.000121609	0.0171033
cg21752413	0.0529	2.56e-05	0.00784814
cg22108567	-0.0529	0.000676457	0.0411096
cg22508831	-0.0529	0.000585098	0.0384294
cg25729350	-0.0529	0.000356093	0.0300528
cg26335251	0.0529	0.000400523	0.0318506
cg27617225	0.0529	0.000242089	0.0246026
cg09603398	-0.0528	0.00036539	0.030338
cg12670943	0.0528	0.000510373	0.0359747
cg18157353	-0.0528	1.25e-05	0.00532058
cg18778196	-0.0528	0.000122251	0.0171706
cg19707448	0.0528	2.69e-05	0.00803548
cg19845878	0.0528	1.88e-05	0.00663687
cg07761912	-0.0527	1.86e-07	0.000483221
cg13245152	-0.0527	0.000848768	0.0458544
cg16031339	-0.0527	0.000144098	0.0187228
cg19737540	-0.0527	9.8e-05	0.0152856
cg20480740	-0.0527	0.000461303	0.0341728
cg22700221	0.0527	0.000321521	0.028531
cg22960833	0.0527	5.42e-05	0.0114614
cg27049076	0.0527	1.28e-06	0.001626
cg03935729	-0.0526	0.000730655	0.0426443
cg13522406	0.0526	0.00062772	0.0396404
cg17001153	0.0526	0.000580973	0.0382953
cg17030173	-0.0526	0.000207824	0.0225984
cg21015805	0.0526	0.000189912	0.0214428
cg21669326	-0.0526	4.13e-05	0.00999349
cg23675809	-0.0526	0.000380636	0.0309838
cg25486361	-0.0526	0.000297569	0.0274389
cg00391067	0.0525	0.000340671	0.0293783
cg08910906	-0.0525	9.14e-05	0.0147266
cg08976646	-0.0525	0.000620217	0.0394492
cg26361533	-0.0525	2.62e-05	0.00793787
cg01372694	0.0524	2.64e-05	0.0079739
cg11338156	-0.0524	0.00055259	0.0372564
cg12798564	0.0524	6.66e-05	0.012652
cg16861241	-0.0524	0.00020422	0.0223461
cg19811994	0.0524	0.000411514	0.0323439
cg20417529	0.0524	2.59e-05	0.00791474
cg25320749	-0.0524	7.46e-05	0.0133806
cg04222933	-0.0523	9.04e-05	0.0146582
cg13746414	-0.0523	1.54e-07	0.000439903
cg20975593	-0.0523	2.14e-05	0.00716595
cg01975510	0.0522	0.000212543	0.0228991
cg12732390	-0.0522	0.000132144	0.017901
cg14985741	-0.0522	8.11e-05	0.0139196
cg23162904	-0.0522	0.000294494	0.0273059
cg06913287	-0.0521	1.17e-05	0.00511963
cg07333922	-0.0521	0.000705507	0.0420796
cg08799727	-0.0521	3.64e-06	0.00287115
cg09871265	-0.0521	0.000156997	0.0195095
cg12449510	-0.0521	0.000235268	0.0241798
cg13121938	0.0521	5.43e-06	0.00353937
cg21934189	-0.0521	0.000691676	0.0416695
cg25258843	-0.0521	0.000741484	0.0428697
cg27611827	-0.0521	1.49e-05	0.00585849
cg01314044	-0.052	0.000534277	0.0366402
cg07949141	0.052	0.000886251	0.0469569
cg13620715	0.052	5.45e-05	0.0114955
cg17457391	-0.052	0.000514557	0.0360871
cg18506744	-0.052	2.51e-05	0.00777092
cg19872923	-0.052	6.09e-05	0.0121473
cg20525763	-0.052	0.000154515	0.0194114
cg20822818	-0.052	0.000156957	0.0195095
cg05700333	-0.0519	2.35e-05	0.00756478
cg05844409	0.0519	0.000544112	0.036993
cg07645542	-0.0519	2.67e-06	0.00245921
cg07800665	-0.0519	0.000600438	0.038887
cg18241877	-0.0519	0.000178215	0.0208401
cg01963573	0.0518	0.000133165	0.0179321
cg01983725	-0.0518	0.000164603	0.0199369
cg10681525	-0.0518	0.000146245	0.0189136
cg12223090	0.0518	0.000693495	0.0417144
cg15332978	-0.0518	0.000600198	0.0388774
cg02217063	-0.0517	0.000636593	0.0399053
cg03006477	-0.0517	0.000626165	0.0396021
cg04992673	0.0517	0.000638099	0.0399533
cg07078329	0.0517	0.000134018	0.0179677
cg08066024	-0.0517	0.000182895	0.0210492
cg08480774	0.0517	8.76e-09	7.13e-05
cg10640362	-0.0517	2.02e-06	0.00215794
cg12950829	-0.0517	0.000117241	0.0167629
cg13939185	-0.0517	0.000785315	0.0441735
cg15343463	0.0517	0.000205494	0.0224325
cg17426969	0.0517	0.000360454	0.0302053
cg18144560	0.0517	0.000789196	0.044287
cg04945945	0.0516	0.000888614	0.0470059
cg04948956	0.0516	0.000894531	0.047111
cg06179749	-0.0516	0.000834471	0.0454344
[truncated: 6,439 more rows]
