# Supplementary material for: Role of Age-Related Changes in DNA Methylation in the Disproportionate Susceptibility and Worse Outcomes of Sepsis in Older Adults
Source: Front Med (Lausanne). 2022 Feb 15;9:822847. doi: 10.3389/fmed.2022.822847 (PMC8886726; doi:10.3389/fmed.2022.822847)
Supplement: Supplementary file 3 [file Table_3.XLSX]

## Sheet: Sheet1
Supplementary Table3. Literature search on sepsis-associated MVPs with large △β (|△β|> 0.2).
Probe ID	△β	Gene	Reference
cg12303247	0.4704	SYT11
cg17589866	0.4163	ALK	https://pubmed.ncbi.nlm.nih.gov/29046432/
cg20995564	-0.4121	ZEB2	https://pubmed.ncbi.nlm.nih.gov/32104945/
cg19789919	-0.3725	ATF7IP
cg05304729	0.3455	MNDA	https://pubmed.ncbi.nlm.nih.gov/20395555/
cg01267076	0.3315	TBX3
cg20228731	-0.3017	FLJ43663
cg15928106	-0.228
cg14195992	-0.2923	KIAA0146
cg17515347	-0.2756	AIM2	https://pubmed.ncbi.nlm.nih.gov/27779186/
cg00490406	-0.2349
cg06804705	-0.2685	NCRNA00114
cg07222133	-0.2506	RNF130
cg23039250	-0.2486	TLR5	https://pubmed.ncbi.nlm.nih.gov/24302927/
cg12992827	-0.2479	LOC152225
cg27307975	-0.2453	LIPC
cg03546163	-0.2452	FKBP5
cg02132463	0.2321	UCMA
cg04036920	0.2262	C11orf41
cg19821297	-0.2226	JUNB	https://pubmed.ncbi.nlm.nih.gov/12857751/
cg26227957	0.2145	KIAA0090
cg23982317	0.2111	FAM129C
cg24954967	-0.2082	XCR1
cg02003183	0.2047	CDC42BPB
cg11384744	-0.2047	TSPAN13
cg16755922	0.2033	FOXK2
cg10949007	-0.2017	GLRX
cg16691087	0.2015	C20orf26
