# Supplementary material for: Role of Age-Related Changes in DNA Methylation in the Disproportionate Susceptibility and Worse Outcomes of Sepsis in Older Adults
Source: Front Med (Lausanne). 2022 Feb 15;9:822847. doi: 10.3389/fmed.2022.822847 (PMC8886726; doi:10.3389/fmed.2022.822847)
Supplement: Supplementary file 4 [file Table_4.XLSX]

## Sheet: Table S4
Supplementary Table 4.Age-related CpG sites in controls.
Probe ID	P.Value	Gene
cg21789229	0.000102467	SCFD2
cg22649068	0.00055165	MCL1
cg07425474	0.000750287	KIAA0415
cg19474239	0.00077804	N6AMT2
cg00311133	0.00112235	SNX21
cg10159032	0.00145476	LRRC37B
cg15157837	0.00189783	CNNM3
cg06542681	0.00218237	VAC14
cg02160627	0.00218503	CD97
cg03027977	0.00221012	UBN2
cg25722644	0.00279843	XKR5
cg12670943	0.00293155	POLDIP3
cg19178853	0.00351457	NBLA00301
cg16755922	0.00369889	FOXK2
cg16371518	0.00461597	AMBRA1
cg03997502	0.00464329	C16orf38
cg05564438	0.00464695	CCDC88B
cg19244662	0.00484733	SLC14A1
cg26257082	0.00528301	MIR181A1HG
cg11336323	0.00534685	ATP5SL
cg24449885	0.00541325	BIN2
cg06414941	0.00553727	ENDOD1
cg15290081	0.00606801	POMZP3
cg21499918	0.00615335	ASB7
cg16375265	0.00637458	FOXK2
cg05509352	0.00657793	ARHGAP26-AS1
cg23344580	0.00662488	CCDC87
cg07602847	0.00668957	DKFZp761E198
cg11287660	0.0067284	C15orf48
cg17208360	0.00675818	SNORD115-37
cg13270236	0.00691608	UBR2
cg10893667	0.00709651	C5orf13
cg03400421	0.00738909	PTF1A
cg22909901	0.00782684	MCF2L2
cg21748244	0.00796977	LCP2
cg13165240	0.0079908	C17orf85
cg22305782	0.00799624	FBXL19
cg00177142	0.00808201	RAB24
cg03450966	0.00858505	UFD1L
cg01619533	0.00858509	ANKRD11
cg10566581	0.00862614	TGIF2
cg10502220	0.00869986	GPM6A
cg12877354	0.00884495	ALOX5
cg19483962	0.00887949	MDC1
cg22731064	0.00907883	CIB2
ch.3.33893856R	0.009234	PDCD6IP
cg11330465	0.0100453	RGS12
cg02357631	0.0104975	CNP
cg21015805	0.0109016	SLC16A5
cg05375999	0.0109888	GSK3A
cg06682330	0.0111647	CSNK1D
cg19530845	0.0111816	OR2D3
cg13630339	0.0112959	DYNC1H1
cg06838978	0.0118928	CROCC
cg03536404	0.0119418	ITSN2
cg26149032	0.0121072	MFSD1
cg18369733	0.0121488	RBM46
cg12150111	0.0123887	PPP1R3G
cg05257275	0.0126675	DKFZp761E198
cg07148145	0.012772	CYP3A43
cg02384251	0.0128245	CTBP1
cg20713816	0.0128433	CETN3
cg15993943	0.0134075	TADA2B
cg08929626	0.0138007	ARHGEF10
cg07394400	0.0140393	RCC2
cg04281219	0.0141515	ENPP5
cg06430309	0.0142536	EIF3B
cg14968553	0.0144259	GALNT10
cg00057434	0.0150598	ARMC4
cg23047792	0.0150847	RPL18
cg11801857	0.0156561	CHST3
cg08511757	0.0166292	ANKRD11
cg01866630	0.0168207	ITPR3
cg03971023	0.0172689	ZBTB7A
cg07623058	0.0177685	IRX4
cg26663716	0.0182575	AGRP
cg17015704	0.018623	FAM184A
cg20729991	0.0189441	SCD
cg04553307	0.0190304	C7orf20
cg01670430	0.0191256	GNA12
cg08826468	0.0192917	SRCAP
cg26624744	0.019329	CYFIP2
cg26838449	0.0198218	NMT2
cg05893542	0.0200716	TRAF3
cg15082870	0.0209076	EEPD1
cg09489682	0.0209533	TFDP1
cg10578938	0.0225774	CYFIP2
cg23840493	0.0228624	FLAD1
cg19554294	0.0234116	VN1R2
cg27123273	0.0235062	PMFBP1
cg26000722	0.0237837	TMEM181
cg07319459	0.0237932	PADI2
cg00851028	0.0239182	LINC01132
cg01937314	0.0241021	LSM2
cg14334350	0.0247404	NOTCH1
cg13393917	0.0252624	OLFML3
cg23108037	0.0260333	MEGF6
cg07800665	0.0260341	LINC00664
cg24681499	0.0260491	FOXJ3
cg21112148	0.0265096	FBXL12
cg06932455	0.0265157	SUMO3
cg09004566	0.0267798	FAM32A
cg16235861	0.0275459	TMEM20
cg11630965	0.0277527	ARHGAP29
cg07961098	0.0277531	SGPP1
cg12728588	0.0280545	NCDN
cg14012686	0.028267	C2orf65
cg02447095	0.0284348	VAC14
cg13831124	0.0287415	DNPEP
cg18536327	0.0287874	GLYCTK
cg22331032	0.0291867	NLRP6
cg23383149	0.0292909	SDR39U1
cg27051171	0.0295391	CMPK2
cg17705056	0.0297252	PQLC1
cg09641127	0.0298895	KLF11
cg24269511	0.0300774	NTF3
cg27401116	0.0301639	EGFL8
cg01116021	0.0303613	AGAP1
cg03411334	0.0304194	ZDHHC14
cg03640756	0.0305045	PCDHGA4
cg04662241	0.0305501	TTC26
cg05876591	0.0306659	RGL2
cg07956775	0.0307169	CALHM2
cg08456817	0.0310665	SIX3
cg13197255	0.0310996	ZFYVE1
cg06357925	0.0312279	PTPRO
cg07657463	0.0312928	NSUN7
cg14059921	0.0313993	ARID3C
cg07035242	0.0318811	UBIAD1
cg22009489	0.032539	MYEOV2
cg02986801	0.032609	ST3GAL1
cg00945238	0.0327372	PCDH10
cg06640364	0.0327737	WIPI2
cg02079413	0.0329836	SNORA54
cg27456220	0.0330839	SLC24A6
cg22305209	0.0333958	NCF4
cg27500575	0.0340213	SS18L1
cg06145708	0.0341426	CCDC15
cg15146720	0.0341617	GALNT11
cg13300580	0.0342599	SLC9A1
cg16927416	0.0343628	LOC731779
cg23058673	0.0344228	TNRC18
cg23580000	0.0346023	ADCY7
cg02783999	0.0347252	ZNF548
cg06209740	0.0348125	RPL10A
cg18089810	0.0355068	NLGN2
cg10821722	0.0355982	MEN1
cg14017402	0.035996	LOC90784
cg15641789	0.0360941	ZNF100
cg04232816	0.0370483	LOC285033
cg15888569	0.03708	CPEB2
cg08692006	0.0372102	TNFAIP8L1
cg23934072	0.037421	KIF21B
cg07050772	0.0374261	XYLT2
cg16654595	0.0375257	OCA2
cg07962309	0.038028	YAF2
cg12909932	0.0380789	LOC100129636
cg06616147	0.0383075	ICK
cg19861138	0.0390069	RPRM
cg03065165	0.0390072	GJC2
cg03748158	0.0392376	KIAA0182
cg14331148	0.0397644	TMEM160
cg03695871	0.0398035	DKFZp761E198
cg24435730	0.0400533	PSMD3
cg00506590	0.0401975	TCF25
cg10735319	0.0403354	PLEKHG3
cg22949949	0.0407355	BCL2L14
cg08796240	0.0413654	VAC14
ch.22.909671F	0.0414927	ATXN10
cg12272104	0.0414942	DAZAP1
cg10819981	0.0418859	TTLL2
cg07266533	0.0420893	EHMT2
cg03871824	0.0426678	ZNF517
cg08017326	0.0435068	CXCL2
cg21918969	0.0436228	RCC2
cg20671910	0.0438977	ZNF687
cg04534198	0.0439661	NEK11
cg26721450	0.044355	PFDN6
cg08712932	0.044707	EYA4
cg07983888	0.0452019	ABCF1
cg06965177	0.0456238	NR1H2
cg07458272	0.0456439	KIAA0355
cg25013852	0.0466002	PGM1
cg09684338	0.0466062	LCK
cg08066214	0.0466538	MMP17
cg06568880	0.0468007	SMG6
cg25456927	0.0470324	TUBB6
cg19262371	0.0472123	NT5C3
cg02076355	0.0476743	C10orf10
cg24865802	0.0477219	NHP2L1
cg19872068	0.0477311	KIAA1267
cg00950398	0.0484066	NKX2-8
cg22448232	0.0486558	PTGFRN
cg26680989	0.0489871	GSE1
cg02929209	0.0491242	DANCR
cg01953591	0.0493342	F5
cg19643035	0.0498631	TMED9
cg17863578	0.0499351	LINC01020
cg16316519	0.04995	LOC389634
cg00130947	0.0496521	LAMA2
cg04344923	0.0491717	MAFK
cg08350797	0.0491545	DUSP7
cg01460382	0.0491459	IQSEC1
cg02905599	0.0491307	POLE
cg24212517	0.0486896	GRN
cg19303682	0.0478383	EBI3
cg20403409	0.0478067	CTBP2
cg17436298	0.0476985	RYR2
cg22423207	0.0475296	APOM
cg24669741	0.0473988	PRG4
cg08417719	0.0473085	OR6T1
cg00587180	0.0466546	ROBO1
cg08347852	0.0464781	LOC100294145
cg08549335	0.046474	ZNRF2
cg10653131	0.0463567	TNFRSF19
cg03725309	0.0462927	SARS
cg00813582	0.0462548	MIR3714
cg06068163	0.0461525	EIF3B
cg12627695	0.0461433	GBX1
cg00859739	0.0460847	LSM14B
cg02658551	0.0460556	KLKB1
cg24007917	0.0458219	CSRP2
cg13101767	0.0451123	GAK
cg02647990	0.0451113	RNF168
cg25296374	0.0441131	CNKSR3
cg18171204	0.0439694	PDZD7
cg21165812	0.0437179	FAM210B
cg23162967	0.0436323	CBLB
cg21106505	0.0434897	RASSF7
cg19484328	0.043473	EPHA4
cg11647719	0.0433238	DIDO1
cg13563132	0.0431892	PTCH1
cg22966899	0.0429513	MAP9
cg11944324	0.0427783	TOLLIP
cg22513924	0.0423682	NMNAT2
cg13121938	0.0416792	RASA3
cg24125282	0.0410535	SHISA6
cg04742397	0.0408737	SNHG10
cg18507365	0.0406162	KCNMA1
cg16566595	0.0403819	WBP11P1
cg09248934	0.0400712	C3orf32
cg14072140	0.0400415	DPYD
cg17162797	0.0400318	RASA3
cg07719172	0.0396997	KCTD10
cg02202077	0.0390463	EIF1AD
cg03527867	0.038986	Magmas
cg05296057	0.0382956	TLE2
cg15034393	0.0381304	RAP2B
cg05316065	0.0379967	GSDMC
cg11992171	0.0379305	KCNJ3
cg20477147	0.0373516	STX16-NPEPL1
cg13917614	0.0369444	CNP
cg22607339	0.0368824	MPL
cg01899624	0.0363529	ATG10
cg02917867	0.0355123	CIRBP
cg21135330	0.0339873	EHBP1
cg02344636	0.0329868	SETD1B
cg10917426	0.0329226	ZBTB12
cg00073090	0.0325962	CIRBP
cg22506801	0.0325355	GRID2
cg23391288	0.0323896	CYSLTR2
cg18371836	0.0317906	WDR11-AS1
cg06233301	0.0317821	CLCN7
cg18612209	0.0316499	INPP5A
cg23146741	0.031607	RNF170
cg26237595	0.0312746	OPCML
cg19503963	0.0311963	SMG6
cg27296759	0.0311472	MAP1B
cg25625514	0.0309454	ACER3
cg08684535	0.0306135	BANP
cg02935272	0.0305873	MYOM1
cg10845147	0.0305777	DUSP1
cg09788778	0.0302905	ZBTB12
cg18995788	0.0302669	MIR4470
cg09288320	0.0297464	C2orf67
cg11678610	0.0292593	ACBD3
cg12457683	0.0286785	MIR4268
cg04517274	0.0286389	ACTN4
cg05102554	0.0286283	XYLB
cg01571625	0.0284791	MIR7-3HG
cg16881843	0.0282788	PRPH2
cg04663692	0.0282719	RMST
cg01609688	0.028131	MIR5579
cg04513311	0.0280437	CBFA2T3
cg08514957	0.0280404	PKN1
cg03162314	0.027641	CTU1
cg15007228	0.027142	SKI
cg22160883	0.0265634	MATR3
cg19844232	0.0265625	ASAP1
cg21804372	0.0263025	AKAP9
cg10175719	0.0262788	WAC-AS1
cg01827818	0.0259944	CCDC60
cg06296597	0.0258639	LARP4B
cg12354870	0.0257173	ADAMTS2
cg04973995	0.0256864	DDIT4
cg02258846	0.024896	SCML4
cg24171992	0.0240876	MAST3
cg24954967	0.0240155	XCR1
cg10396171	0.0239282	C16orf11
cg10099209	0.0237294	ADH6
cg03990998	0.0236865	CPEB2
cg07572214	0.0234394	AUTS2
cg26269630	0.0219713	LPHN3
cg16226785	0.0219154	AGBL1
cg07573872	0.0216374	SBNO2
cg09743199	0.0206018	BTBD9
cg25983901	0.0203802	TNS3
cg08881610	0.0198899	MCHR2-AS1
cg09900893	0.0198546	RPS6KA1
cg07709210	0.0193611	PGC
cg17183905	0.0184739	TRPV4
cg26915343	0.0181536	NT5C1B-RDH14
cg17316030	0.0174845	SYNE2
cg23678165	0.0172636	TFEB
cg24188561	0.0169515	SIRT2
cg14391586	0.0166827	SOX18
cg12736037	0.0165255	QKI
cg06501157	0.0165059	GPR75-ASB3
cg10038867	0.016472	RAP1GAP
cg26698580	0.016271	PARD6A
cg00098280	0.0161059	KIAA1012
cg05269017	0.015859	TRAIP
cg21990700	0.0157012	LOC283314
cg10490843	0.0155651	STARD3
cg01314044	0.0151548	C11orf97
cg13481271	0.0150034	GOLGA1
cg01406381	0.0148566	SLC1A5
cg16618104	0.0142645	CHST11
cg08466051	0.0138994	TTC21B
cg04060487	0.0131083	PTBP1
cg18657751	0.0130159	GAS7
cg14985741	0.0127961	TNFRSF19
cg04026699	0.0118143	LOC401242
cg03998636	0.0114497	RAB20
cg12967370	0.0109013	RFESD
cg09934692	0.0105156	FIGNL2
cg03068030	0.0101345	TTC38
cg10826175	0.00949781	MBL2
cg24400553	0.00899078	FAM108A1
cg06318013	0.00854634	KCNK3
cg13155421	0.00829489	CBLB
cg25607249	0.00778279	SLC1A5
cg18618815	0.00776468	COL1A1
cg19172665	0.00752535	FREM3
cg15344914	0.00741338	SMUG1
cg20648272	0.00662524	DLGAP4
cg16736826	0.00654932	EDN2
cg25604066	0.00634243	RIPK2
cg21469505	0.00632918	LIPG
cg09814912	0.00577694	SNORA2A
cg09919743	0.00525455	KLF13
cg27174978	0.00461227	TLR3
cg23623251	0.00289597	BMP6
cg09186689	0.00217309	LOC285401
cg20813374	0.00213451	FKBP5
cg13220209	0.00195284	ICK
cg03899775	0.00148538	LARS2
cg01671681	0.00132578	PLCH1
cg10812247	0.00112372	SLC16A7
cg12483947	0.00110828	SGPL1
cg11310639	0.00107927	PTPN20B
cg19702176	0.000850927	EPHA4
cg04357717	0.000562685	ZPLD1
cg27262041	0.000310515	NAV2
cg14021717	0.000212888	WDR5
cg26671687	6.18e-06	SSBP3
