# Supplementary material for: Role of Age-Related Changes in DNA Methylation in the Disproportionate Susceptibility and Worse Outcomes of Sepsis in Older Adults
Source: Front Med (Lausanne). 2022 Feb 15;9:822847. doi: 10.3389/fmed.2022.822847 (PMC8886726; doi:10.3389/fmed.2022.822847)
Supplement: Supplementary file 5 [file Table_5.XLSX]

## Sheet: Sheet1
Supplementary Table 5. Fisher’s exact test.
	Age-related CpG sites	Non age-related CpG sites	Total
Sepsis-related CpG sites	366	8071	8437
Non sepsis-related CpG sites	19356	390196	409552
Total	19722	398267	417989
