# Supplementary material for: Role of Age-Related Changes in DNA Methylation in the Disproportionate Susceptibility and Worse Outcomes of Sepsis in Older Adults
Source: Front Med (Lausanne). 2022 Feb 15;9:822847. doi: 10.3389/fmed.2022.822847 (PMC8886726; doi:10.3389/fmed.2022.822847)
Supplement: Supplementary file 6 [file Table_6.XLSX]

## Sheet: Table S6
Supplementary Table 6. Sepsis outcome-related CpG sites.
Probe ID	P.Value
cg00002464	0.0434576
cg00004806	0.0258388
cg00033551	0.000314957
cg00101457	0.023559
cg00139947	0.00296661
cg00159799	0.00723984
cg00168118	0.000534665
cg00169184	0.0413331
cg00177142	0.00377675
cg00188822	0.0145704
cg00254470	0.00225388
cg00275103	0.0117693
cg00316520	0.0278625
cg00382930	0.0405982
cg00391067	0.012983
cg00471400	0.0419969
cg00472520	0.0120223
cg00498059	0.00269322
cg00514486	0.0177501
cg00522231	0.0454431
cg00534468	0.00193932
cg00563768	0.0105385
cg00590152	0.00681353
cg00619628	0.00159143
cg00634542	0.0482791
cg00686694	0.0492223
cg00705600	0.0344048
cg00744495	0.0349012
cg00782811	0.0267949
cg00799387	0.000245934
cg00813509	0.00192255
cg00826902	0.049144
cg00840990	0.0325599
cg00851028	0.00333616
cg00868074	0.0203985
cg00921574	0.0498509
cg00924727	0.00782221
cg00965121	0.0300549
cg00981877	0.0488491
cg01004017	0.00801169
cg01059398	0.0263095
cg01101459	0.00118242
cg01114989	0.0190934
cg01140149	0.018066
cg01149053	0.00592312
cg01316923	0.0337377
cg01350996	0.0173462
cg01381367	0.00697304
cg01426853	0.00351958
cg01582532	0.0208477
cg01616489	0.0492047
cg01725586	0.0434854
cg01799521	0.00394772
cg01877879	0.0356789
cg01891736	0.0090557
cg01892655	0.0277739
cg01919885	0.00137005
cg01924493	0.0216276
cg01926073	0.042928
cg01975510	0.00320449
cg02003183	0.0113058
cg02031634	0.0290228
cg02086839	0.00649261
cg02209932	0.0401014
cg02258846	0.0185526
cg02347984	0.0419809
cg02412345	0.0211195
cg02448796	0.00505924
cg02462443	0.0305929
cg02464912	0.00419079
cg02543993	0.00495608
cg02558026	0.00587942
cg02595807	0.0484431
cg02666020	0.000123181
cg02688927	0.0143475
cg02765363	0.0325719
cg02771673	0.0256689
cg02814054	0.021433
cg02819010	0.0252315
cg02879453	0.0300848
cg02905426	0.0133186
cg02907064	0.0324457
cg02909097	0.0109847
cg02931526	0.0118275
cg02976843	0.0069028
cg02994326	0.0335509
cg03027241	0.0214044
cg03045648	0.00736462
cg03062881	0.00928043
cg03074946	0.0448754
cg03190911	0.0477915
cg03237324	0.0345644
cg03267442	0.00220174
cg03267954	0.000433146
cg03281139	0.0378748
cg03369999	0.0325975
cg03373857	0.0495731
cg03411334	0.00874777
cg03446165	0.0281801
cg03449175	0.0224959
cg03497652	0.0294852
cg03536404	0.0402888
cg03590328	0.0245563
cg03594868	0.00887584
cg03612357	0.0466502
cg03646542	0.00158969
cg03657031	0.037975
cg03670228	0.00672657
cg03697881	0.0417363
cg03699074	0.00983649
cg03719539	0.023223
cg03734026	0.000921233
cg03860038	0.0463081
cg03899510	0.00195101
cg03915055	0.0376777
cg03937290	0.0201064
cg03948682	0.0110235
cg03970086	0.0148256
cg03987653	0.00436435
cg04036920	0.0181043
cg04057037	0.0175074
cg04203950	0.0472074
cg04206572	0.0474981
cg04222728	0.00837064
cg04268643	0.0365183
cg04323925	0.034971
cg04326337	0.00754473
cg04396125	0.0470082
cg04415662	0.0353038
cg04448141	0.00772979
cg04494844	0.0325357
cg04513311	0.00136981
cg04523589	4.44e-05
cg04538585	0.00725815
cg04544017	0.001283
cg04558049	0.0467946
cg04602787	0.0298307
cg04612203	0.0096954
cg04691264	0.026894
cg04718845	0.0137794
cg04785213	0.0114936
cg04831048	0.023192
cg04887544	0.0156596
cg04913803	0.0446168
cg04955485	0.046106
cg04964733	0.0460131
cg04987734	0.00231201
cg05045702	0.00162487
cg05100282	0.0236907
cg05105207	0.0372842
cg05112986	0.0318481
cg05137064	0.0373379
cg05155047	0.0313333
cg05185021	0.00297106
cg05189570	0.0111201
cg05257275	0.0380051
cg05290708	0.0246997
cg05300717	0.0265116
cg05304729	0.0404568
cg05316065	0.0418716
cg05399785	0.00497487
cg05400196	0.0214768
cg05445008	0.00610442
cg05488770	0.0239704
cg05544807	0.0207017
cg05573654	0.0406077
cg05622422	0.0339707
cg05624954	0.000102109
cg05638500	0.0374354
cg05731560	0.00270318
cg05891292	0.0305994
cg05926606	0.0452147
cg06008638	0.0192322
cg06015525	0.00130886
cg06094745	0.0234435
cg06169557	0.0186985
cg06189670	0.0433908
cg06262098	0.0238509
cg06269204	0.0193716
cg06270206	0.0209907
cg06363865	0.000460894
cg06379214	0.00154726
cg06418973	0.0346914
cg06430309	0.000267991
cg06438942	0.0453896
cg06458698	0.0458436
cg06462195	0.00425944
cg06462663	0.0257273
cg06466360	0.0239042
cg06487369	0.0420799
cg06542681	0.0241348
cg06547285	0.0493593
cg06552368	0.0393806
cg06575692	0.0260065
cg06616093	0.0354981
cg06629453	0.0124742
cg06659073	0.0438639
cg06682330	0.0318507
cg06704579	0.0287244
cg06710464	0.0426925
cg06725287	0.0227808
cg06758448	0.0296736
cg06778713	0.0309218
cg06804705	0.0406477
cg06839111	0.0157618
cg06932837	0.0023096
cg06948435	0.00615059
cg06953065	0.0324207
cg07012687	0.000532116
cg07107427	0.0328782
cg07114353	0.015043
cg07145398	0.0348243
cg07151637	0.0365135
cg07168939	0.0143757
cg07208029	0.000388334
cg07222133	0.0201735
cg07267600	0.043947
cg07292606	0.00911196
cg07355446	0.0298804
cg07379813	0.000245262
cg07500019	0.0264758
cg07521618	0.0074727
cg07521929	0.0364187
cg07555102	0.00928854
cg07570498	0.0146999
cg07580783	0.0313574
cg07709210	0.0401141
cg07718244	0.00167925
cg07751803	0.0428946
cg07812289	0.0194061
cg07835154	0.0272573
cg07898264	0.0309829
cg07916071	0.01461
cg07969918	0.0178329
cg07978145	0.0329296
cg07993112	0.0026608
cg08041019	0.00628882
cg08238265	0.0235184
cg08264704	0.0133428
cg08284926	0.0314047
cg08289839	0.0493051
cg08320225	0.0408737
cg08324925	0.0130138
cg08330919	0.0167026
cg08415156	0.00626408
cg08422803	0.00675654
cg08453903	0.0272892
cg08483723	0.0211197
cg08521187	0.000879386
cg08534055	0.0147855
cg08539067	0.00553371
cg08551248	0.019188
cg08563299	0.0123524
cg08575922	0.0194316
cg08585614	0.0496345
cg08641078	0.0339628
cg08672956	0.000382251
cg08749775	0.0315717
cg08791347	0.013104
cg08796240	0.00598727
cg08830672	0.00867267
cg08894401	0.00132258
cg08915438	0.0139778
cg09139144	0.037205
cg09192333	0.0397824
cg09205083	0.0267594
cg09221482	0.0115531
cg09262100	0.0301593
cg09291026	0.0212878
cg09354949	0.0357806
cg09416188	0.0287043
cg09428024	0.0441865
cg09479650	0.0100881
cg09481056	0.0268677
cg09505513	0.00103141
cg09610644	0.00744957
cg09612502	0.00881268
cg09619706	0.0471192
cg09641325	0.0294891
cg09686672	0.0307292
cg09701102	0.00649782
cg09734418	0.0259575
cg09738906	0.0369023
cg09744376	0.0283756
cg09807356	0.00125115
cg09816821	0.0075393
cg09875326	0.0488806
cg10019844	0.0113347
cg10131095	0.00588726
cg10143543	0.0182855
cg10170678	0.0185141
cg10255544	0.0131161
cg10283036	0.00781377
cg10318222	0.00838804
cg10333594	0.00185871
cg10377299	0.0203289
cg10383428	0.0380778
cg10389930	0.0462525
cg10444530	0.0292422
cg10462803	0.00493144
cg10578938	0.030116
cg10600730	0.0446643
cg10654010	0.0378111
cg10722267	0.00695156
cg10759293	0.0479419
cg10791580	0.0473084
cg10836733	0.00186164
cg10946510	0.0116319
cg11016847	7.6e-05
cg11021321	0.0468149
cg11091012	0.0163144
cg11117684	0.0171087
cg11183227	0.00211881
cg11196788	0.0111839
cg11248254	0.0384532
cg11254522	0.0123654
cg11276172	0.000975018
cg11330465	0.0482514
cg11337915	0.0253676
cg11409837	0.0486801
cg11450001	0.0106707
cg11872583	0.0343434
cg11949533	0.0214696
cg11951449	0.0298994
cg11958668	0.0136598
cg12058372	0.00173351
cg12091346	0.0281106
cg12223090	0.0094877
cg12305753	0.00550337
cg12332239	0.00146448
cg12341429	0.0239892
cg12465501	0.0236302
cg12508336	0.0393904
cg12535642	0.000108793
cg12537003	0.00908308
cg12558966	0.020373
cg12620005	0.0300541
cg12658897	0.0166529
cg12670943	0.00630097
cg12710800	0.015432
cg12728588	0.0399203
cg12736206	0.0304778
cg12740037	0.0102971
cg12781678	0.0116127
cg12796272	0.0460266
cg12884704	0.0351727
cg12900931	0.0209658
cg12983839	0.0231503
cg12997627	0.0147489
cg13005202	0.0420004
cg13033858	0.026959
cg13067350	0.0377669
cg13074965	0.0293495
cg13139542	0.0233663
cg13165240	0.00904638
cg13167263	0.0385932
cg13197255	0.00859436
cg13235761	0.0240583
cg13270236	0.0376508
cg13300580	0.0386999
cg13315706	0.0186523
cg13365641	0.0106027
cg13431009	0.00335605
cg13446235	0.0281004
cg13464142	0.04461
cg13466364	0.0292603
cg13522406	0.045785
cg13556663	0.00346952
cg13620921	0.0159602
cg13630339	0.00313298
cg13645296	0.00103303
cg13706315	0.00768948
cg13707005	0.0327474
cg13806031	0.0260237
cg13824385	0.036126
cg13889934	0.0166218
cg13920521	0.0465737
cg13952914	0.0462433
cg14017402	0.00563616
cg14030388	0.027405
cg14043527	0.0396495
cg14058851	0.0328939
cg14065720	0.0495978
cg14156121	0.0274518
cg14166197	0.000563238
cg14195992	0.0160595
cg14212631	0.0481441
cg14237301	0.000713312
cg14247476	0.0216962
cg14299800	0.0377629
cg14326413	0.0241249
cg14334350	0.0203649
cg14399228	0.038209
cg14426001	0.0455983
cg14427590	0.00478993
cg14531072	0.0175703
cg14553895	0.010804
cg14579314	0.0311523
cg14588738	0.00619331
cg14630032	0.00310835
cg14667838	0.00544606
cg14695240	0.0407759
cg14712784	0.0344446
cg14734916	0.0392466
cg14837130	0.0433952
cg14911460	0.00510975
cg14968553	0.0202869
cg14992232	0.0154971
cg15035956	0.0378706
cg15049177	0.00132208
cg15090899	0.00211093
cg15143938	0.0480481
cg15279866	0.00507311
cg15286094	0.000570102
cg15310871	0.0280578
cg15329510	0.0232955
cg15335297	0.0363123
cg15344640	0.00703941
cg15458338	0.0191394
cg15551881	0.0109345
cg15672331	0.00495068
cg15677825	0.0257817
cg15705273	0.0105798
cg15715933	0.0034427
cg15765251	0.00529995
cg15788645	0.0401425
cg15802639	0.0191413
cg15928106	0.0112854
cg15939937	0.0079233
cg16063989	0.0154333
cg16125214	0.0087047
cg16179748	0.0291614
cg16371518	0.00248922
cg16375265	0.000254097
cg16395997	0.00771009
cg16402746	0.040081
cg16488580	0.0232179
cg16524286	0.0187581
cg16615776	0.00932517
cg16639691	0.013437
cg16663980	0.038671
cg16743273	0.00511978
cg16755922	0.00720491
cg16777510	0.0414018
cg16805291	0.0481559
cg16875057	0.0335302
cg16886828	0.0469442
cg16919517	0.0464986
cg17001153	0.0234766
cg17016145	0.0369825
cg17021875	0.0032543
cg17022038	0.0300034
cg17051905	0.0400091
cg17195103	0.0482173
cg17304467	0.0103721
cg17306706	0.0097233
cg17330097	0.0020978
cg17338212	0.0167237
cg17408637	0.0105933
cg17411016	0.0358913
cg17418387	0.00146375
cg17462329	0.00775588
cg17602444	0.0430677
cg17619876	0.0051102
cg17636309	0.000917203
cg17732216	0.0346332
cg17781958	0.00131463
cg17782974	0.00479814
cg17804886	0.0102808
cg17884674	0.0102153
cg17890233	0.0156069
cg17924085	0.042513
cg17960717	0.00164299
cg17966709	0.0295394
cg18048544	0.0403081
cg18050634	0.022333
cg18113453	0.0154019
cg18190798	0.012463
cg18200389	0.0030488
cg18257485	0.0357164
cg18282388	0.0230103
cg18330784	0.0141941
cg18357668	0.021987
cg18518074	0.00332577
cg18593727	0.0231358
cg18595293	0.0303038
cg18599110	0.0385721
cg18720393	0.0411122
cg18732869	0.0438753
cg18762849	0.0452651
cg18809973	0.0292008
cg18821320	0.00879061
cg18874907	0.0148927
cg18919659	0.0308007
cg19089314	0.0293067
cg19120782	0.0387284
cg19137806	0.00199103
cg19201894	0.0153219
cg19236431	0.0285135
cg19302441	0.0228097
cg19377250	0.0324845
cg19474239	0.0379321
cg19557110	0.00916143
cg19571034	0.0410592
cg19585103	0.0478161
cg19604369	0.0159845
cg19619585	0.0200377
cg19679250	0.039129
cg19722639	0.0357902
cg19728226	0.0406482
cg19743721	0.00334678
cg19750657	0.0494268
cg19764539	0.0341736
cg19776453	0.0174653
cg19780717	0.00608779
cg19782190	0.0219958
cg19851574	0.00314265
cg19856252	0.0180323
cg20000132	0.0145082
cg20173011	0.0305038
cg20228731	0.0096156
cg20284218	0.0479185
cg20332725	0.00893678
cg20356510	0.0348887
cg20380468	0.000371609
cg20396423	0.0335925
cg20412356	0.00158607
cg20633339	0.00301529
cg20651995	0.0376241
cg20660269	0.0425659
cg20671910	0.000706326
cg20729991	0.00495328
cg20798677	0.0307283
cg20813374	0.0284785
cg20895785	0.0419539
cg21211645	0.00774818
cg21265439	0.0137961
cg21416544	0.00191486
cg21420531	0.0444051
cg21498475	0.00984972
cg21527616	0.0487119
cg21646060	0.0157241
cg21719817	0.0123628
cg21752413	0.00696343
cg21780428	0.00973603
cg21805179	0.0161381
cg21855205	0.0156057
cg21870776	0.0375819
cg21918969	0.00276088
cg21950196	0.0198632
cg22077962	0.0475066
cg22140583	0.013119
cg22144450	0.000225767
cg22185977	0.00589995
cg22221730	0.0392246
cg22290528	0.00249989
cg22292478	0.0240653
cg22368305	0.0420226
cg22387253	0.0379057
cg22441312	0.0386118
cg22483743	0.0437632
cg22528123	0.0110315
cg22794990	0.00979559
cg22860367	0.0439856
cg22862734	0.0135507
cg22885062	0.0178338
cg22891988	0.0446255
cg22960833	0.00476346
cg23022574	0.0335976
cg23065174	0.0077256
cg23068665	0.0491325
cg23108037	0.0259438
cg23166740	0.0343521
cg23167259	0.0432361
cg23190994	0.0459336
cg23278137	0.0353433
cg23311195	0.00786417
cg23319171	0.0210709
cg23342148	0.0421824
cg23380956	0.0208896
cg23383149	0.03906
cg23409835	0.0385188
cg23412033	0.0188247
cg23449274	0.0070861
cg23580000	0.0120062
cg23598089	0.00106306
cg23729283	0.0115385
cg23759710	0.0215579
cg23761815	0.0259995
cg23777479	0.00736136
cg23895055	0.0271152
cg23902264	0.00752854
cg23922643	0.022252
cg23934072	0.00373355
cg23953831	0.0266285
cg23965551	0.0344704
cg24019564	0.0481141
cg24029430	0.0491203
cg24298409	0.00739374
cg24306779	0.0266346
cg24366564	0.0282493
cg24408769	0.00794588
cg24427724	0.0401388
cg24500422	0.018812
cg24529484	0.00439693
cg24539573	0.0135334
cg24607814	0.0283951
cg24678869	0.0425467
cg24708254	0.0177183
cg24773560	0.0400662
cg24819835	0.00477363
cg24833569	0.0311426
cg24859226	0.0487406
cg25114611	0.0359048
cg25163651	0.028985
cg25317233	0.0101461
cg25336731	0.0262165
cg25338531	0.0426214
cg25344064	0.0216971
cg25396690	0.0494293
cg25408237	0.0036413
cg25489370	0.00987771
cg25554212	0.021644
cg25653947	0.00419785
cg25663755	0.0463182
cg25735823	0.0249716
cg25766247	0.016211
cg25786273	0.00190077
cg25792351	0.0263924
cg25961567	0.00216592
cg26070757	0.00210965
cg26074111	0.0156095
cg26227957	0.0306139
cg26237595	0.0418443
cg26303870	0.00399789
cg26344619	0.00743884
cg26410121	0.024091
cg26465837	0.0243369
cg26610247	0.000432404
cg26648465	0.0091923
cg26653818	0.0154326
cg26675379	0.0206141
cg26680989	0.00239975
cg26804423	0.0130255
cg26889564	0.010931
cg26915370	0.00198852
cg27049076	0.0466046
cg27064178	0.0467265
cg27243685	0.0407668
cg27288091	0.0107866
cg27333269	0.0110529
cg27370104	0.0258688
cg27457201	0.00840521
cg27489772	0.0181049
cg27617225	0.0244627
ch.14.1488981R	0.00786428
ch.18.310800R	0.0451353
