# Supplementary material for: Role of Age-Related Changes in DNA Methylation in the Disproportionate Susceptibility and Worse Outcomes of Sepsis in Older Adults
Source: Front Med (Lausanne). 2022 Feb 15;9:822847. doi: 10.3389/fmed.2022.822847 (PMC8886726; doi:10.3389/fmed.2022.822847)
Supplement: Supplementary file 7 [file Table_7.XLSX]

## Sheet: Table S7
Supplementary Table 7. Age-related CpG sites in sepsis patients.
Probe ID	P.Value	Gene
cg00033551	0.0264607	MGRN1
cg00139947	0.0203634	TOP1MT
cg00254470	0.0049861	PVT1
cg00391067	0.0135696	LOC100271715
cg00498059	0.000834001	LMF1
cg00522231	0.00299564	ITGB1BP1
cg00826902	0.000259747	WDR8
cg00965121	0.000859739	LOC388588
cg01059398	0.00858284	TNFSF10
cg01101459	0.012152	LINC01132
cg01892655	0.00026141	TMEM41A
cg02003183	0.0040802	CDC42BPB
cg02543993	0.00105438	RNF216
cg02595807	0.035231	GATAD2A
cg02994326	0.0327118	SMURF1
cg03062881	0.00442548	PCNT
cg03237324	0.000178435	PLEKHG6
cg03267954	0.00886437	UNC93B1
cg03373857	0.0050546	WBSCR16
cg03446165	0.0190488	MMP25
cg03497652	0.0485953	ANKS3
cg03536404	0.0126512	ITSN2
cg03657031	0.0147307	PRKCG
cg03719539	0.0230401	SCRT1
cg03899510	0.0271803	DLL1
cg04036920	0.0013301	C11orf41
cg04326337	0.0107696	RPRD1B
cg04396125	0.00299551	ZNF358
cg04602787	0.00514941	FIP1L1
cg04964733	0.0115164	GXYLT1
cg04987734	0.0182253	CDC42BPB
cg05100282	0.00288066	BCL11B
cg05290708	0.00897693	ADCK2
cg05399785	0.0166784	WDR8
cg05445008	0.0184327	SAC3D1
cg05488770	0.000708953	LHFPL3
cg05544807	0.0216181	DNMT3A
cg05926606	0.0235048	BRWD1
cg06015525	0.000255723	ARHGAP9
cg06094745	0.00133734	HDAC4
cg06462195	0.00166063	LINC01012
cg06542681	0.0199807	VAC14
cg06659073	0.000350012	SERAC1
cg06704579	0.0122717	TRIM7
cg06953065	0.0300075	AUTS2
cg07145398	1.68e-05	CYB561
cg07151637	0.0439751	DEPDC5
cg07168939	0.0164689	PSCA
cg07222133	0.0157516	RNF130
cg07355446	0.00208371	NOP16
cg07521929	0.0392645	SLC4A9
cg08238265	0.0333827	SYNE2
cg08264704	0.0199773	ARF1
cg08330919	0.00292968	LOC344967
cg08483723	0.0163131	TMEM158
cg08521187	0.0476356	LOC100506274
cg08551248	2.42e-05	BMP8B
cg08796240	0.00465706	VAC14
cg09192333	0.00206171	TRIOBP
cg09205083	0.00836419	KIAA0182
cg09221482	0.0023579	AGPAT4
cg09610644	0.00888697	BDH1
cg09734418	0.00911297	ITGB1BP1
cg09738906	0.00269398	NR2F2
cg10383428	0.04076	NCAPD2
cg10444530	0.0218867	PCMTD1
cg10578938	0.00611384	CYFIP2
cg11016847	0.0416488	AP2A2
cg11183227	0.00786184	MAN2A2
cg11196788	0.0415898	NUMA1
cg11450001	0.00593883	GABARAPL1
cg11951449	0.0498765	SLC22A15
cg11958668	0.018765	RNF103
cg12058372	0.0311751	B4GALT5
cg12091346	0.0443663	PLXND1
cg12305753	0.0417906	KCNE1
cg12508336	0.0284421	ILF3
cg12658897	0.00034835	VPS37C
cg12670943	0.0338866	POLDIP3
cg12728588	0.0251974	NCDN
cg12736206	0.0271156	ZC3H11A
cg12884704	0.0164219	BPHL
cg12900931	0.00331986	ZNF195
cg13033858	0.0360641	SSH1
cg13165240	0.0410668	C17orf85
cg13167263	0.00715368	XPNPEP1
cg13315706	0.0354226	ITGB2
cg13446235	0.00207752	AFG3L1
cg13466364	0.046417	NAA15
cg13707005	0.00923296	CUGBP2
cg13806031	0.00877845	FBXW4
cg13920521	0.00784187	TMEM54
cg14212631	0.0262919	ASPM
cg14237301	0.0278046	APOB48R
cg14588738	0.00115297	MIR548Q
cg14630032	0.0257437	CP
cg14695240	0.0109136	FLJ32810
cg14968553	0.0283023	GALNT10
cg15143938	0.000308104	SCARNA20
cg15458338	1.98e-05	ADCYAP1
cg15551881	0.00868443	TRAF1
cg16063989	0.0322685	JHDM1D-AS1
cg16395997	0.0349741	WDR8
cg16639691	0.0341023	FLT3
cg16663980	0.0003143	MNDA
cg16805291	0.00271151	EEPD1
cg17330097	0.0091638	CTSE
cg17338212	0.000487282	FOXL2
cg17418387	0.0259139	RCC2
cg17462329	0.029518	P4HB
cg17732216	0.0341512	RPS6KA2
cg17782974	0.0465385	TRIM8
cg17804886	0.000349892	RASA3
cg17884674	0.0213937	CSNK1G2
cg17890233	0.0443254	DAGLB
cg17924085	0.00540206	NAT14
cg17966709	0.0242021	ZDHHC5
cg18599110	0.000638249	HYAL3
cg18732869	0.0252869	TRIP10
cg19137806	0.0420149	INPP5A
cg19236431	0.00401947	SYNJ2
cg19585103	0.0237322	SKAP1
cg19604369	0.00478143	ABCC2
cg19728226	0.0271685	HOXD11
cg19743721	0.0210204	ALKBH4
cg19856252	0.000632141	KY
cg20284218	0.00321011	SLC3A2
cg20380468	0.0150677	FYB
cg20651995	0.0304337	GFPT1
cg20798677	0.00394925	FKBP10
cg20813374	0.0393576	FKBP5
cg20895785	0.0159241	STEAP2
cg21265439	0.000324195	EIF5
cg21416544	0.0185598	A2ML1
cg21719817	0.0366522	JARID2
cg21805179	0.0104602	MPHOSPH9
cg21870776	0.00235634	C1QL4
cg22221730	0.036779	IP6K1
cg22290528	0.015234	HEXA
cg22292478	0.00990579	ETV4
cg22368305	0.0113642	FAM149A
cg22891988	0.00248228	MPPED2
cg23022574	0.00154728	MIR375
cg23068665	0.00690601	TPD52L1
cg23190994	0.000388702	ZNF546
cg23449274	0.0255757	AMBRA1
cg23598089	0.0348529	ATP2B4
cg23729283	1.78e-05	CPVL
cg23761815	0.0372327	SLC29A3
cg23777479	0.0487472	PCCA
cg24029430	0.0188895	CISD1
cg24306779	0.000155721	MMP15
cg24408769	0.00318371	JARID2
cg24500422	0.0225801	MSH5
cg24529484	0.0135503	SLC8A2
cg25163651	0.0315323	LOC646214
cg25396690	0.00313978	CMPK2
cg25554212	0.00989999	COL23A1
cg25961567	0.0284838	NCK2
cg26227957	0.0268875	KIAA0090
cg27064178	0.0118705	BRD1
cg27457201	0.0357735	RPTOR
ch.18.310800R	0.0221813	CEP192
