# Supplementary material for: Role of Age-Related Changes in DNA Methylation in the Disproportionate Susceptibility and Worse Outcomes of Sepsis in Older Adults
Source: Front Med (Lausanne). 2022 Feb 15;9:822847. doi: 10.3389/fmed.2022.822847 (PMC8886726; doi:10.3389/fmed.2022.822847)
Supplement: Supplementary file 8 [file Table_8.XLSX]

## Sheet: Table S
Supplementary Table 8. Characteristics of the sepsis patients and controls in validation cohort.
	sepsis	control
	(n=48)	(n=48)
Mean age (yr)	65.04±15.53	62.75±15.51
Male sex (%)	0.354	0.375
Cancer	0.188
Chronic kidney disease	0.167
ICU admission examination
Scr (umol/L)	92.1±59.5
WBC (*10^9/L)	12.7±6.5
PLT (*10^9/L)	194.4±126.1
CRP (mg/L)	83.7±66.0
SOFA score	8.0±4.8
APACHEII score	19.2±8.0
Hospitalized mortality	0.417
Data shown are mean ± SD. Scr, Serum creatine; WBC, white blood cell; PLT, blood platelet; CRP, C‐reactive protein; SOFA, Sequential Organ Failure Assessment; APACHE II, Acute Physiology and Chronic Health Evaluation II.
